# Supplementary material for: Experimental evidence for the functional importance and adaptive advantage of A-to-I RNA editing in fungi
Source: PubMed Central journal article supplement — Proc Natl Acad Sci U S A. 2023 Mar 14;120(12):e2219029120. doi: 10.1073/pnas.2219029120 (PMC10041177; doi:10.1073/pnas.2219029120), 2023-03-14
Supplement: pnas.2219029120.sapp.pdf [file pnas.2219029120.sapp.pdf]

## Supporting Information for

### Experimental evidence for the functional importance and adaptive advantage of A-to-I RNA editing in fungi

Kaiyun Xin<sup>1</sup>, Yang Zhang<sup>1</sup>, Ligang Fan<sup>1</sup>, Zhaomei Qi<sup>1</sup>, Chanjing Feng<sup>1</sup>, Qinhu Wang<sup>1</sup>, Cong Jiang<sup>1</sup>, Jin-Rong Xu<sup>2</sup>, Huiquan Liu<sup>1\*</sup>

\* Corresponding author: Huiquan Liu  
Email: liuhuiquan@nwsuaf.edu.cn

#### This PDF file includes:

Figures S1 to S8  
Tables S1 to S4  
SI References

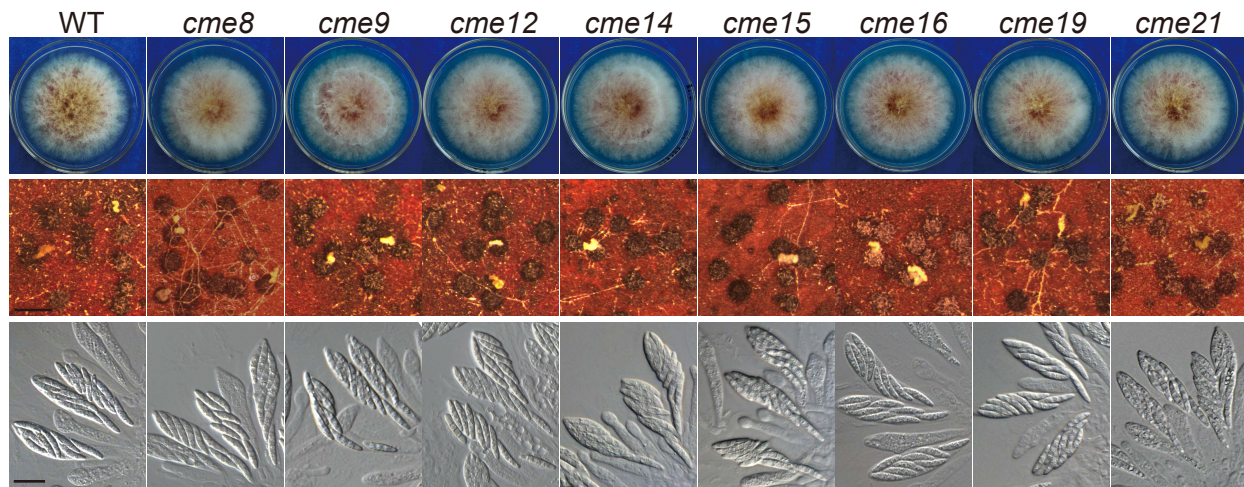

**Fig. S1.** Vegetative growth and sexual reproduction of deletion mutants of 8 *CME* genes. Three-day-old PDA cultures and 8-dpf mating cultures of PH-1 (WT) and the marked deletion mutants were examined for colony morphology, perithecium formation, and ascus/ascospore morphology. Bar = 0.5 mm (middle panel); Bar = 20  $\mu$ m (bottom panel).

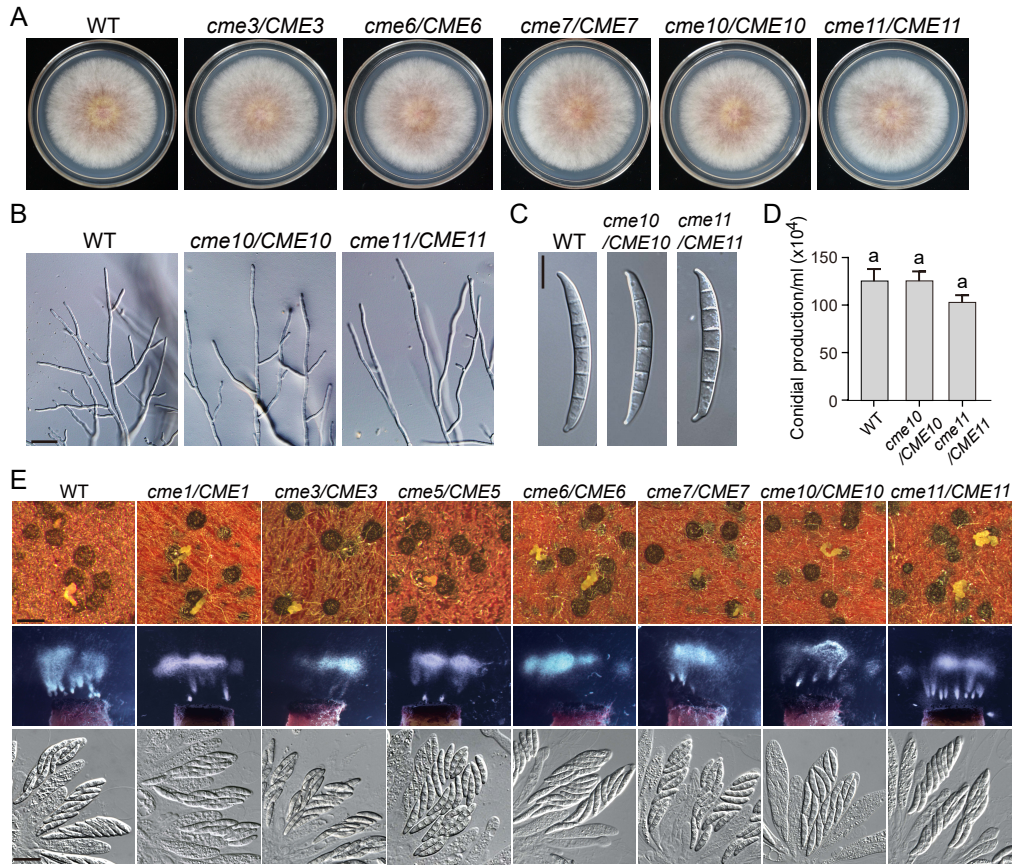

**Fig. S2.** Vegetative growth, conidiation, and sexual reproduction of complemented strains. (A-B) Three-day-old PDA cultures (A) and 48-h hyphal tips (B) of the marked strains. Bar = 20  $\mu$ m. (C-D) Conidial production of the marked strains were examined by differential interference contrast microscopy. Bar = 10  $\mu$ m. Mean and standard deviation were calculated with data from three independent repeats ( $n = 3$ ). The same letters indicate no significant differences based on one-way ANOVA followed by Turkey's multiple range test ( $P > 0.05$ ). (E) Mating cultures of the marked strains were examined for perithecium formation, ascospore discharge, and asci/ascospores morphology at 8-dpf. Bar = 0.5 mm (top panel); Bar = 20  $\mu$ m (bottom panel).

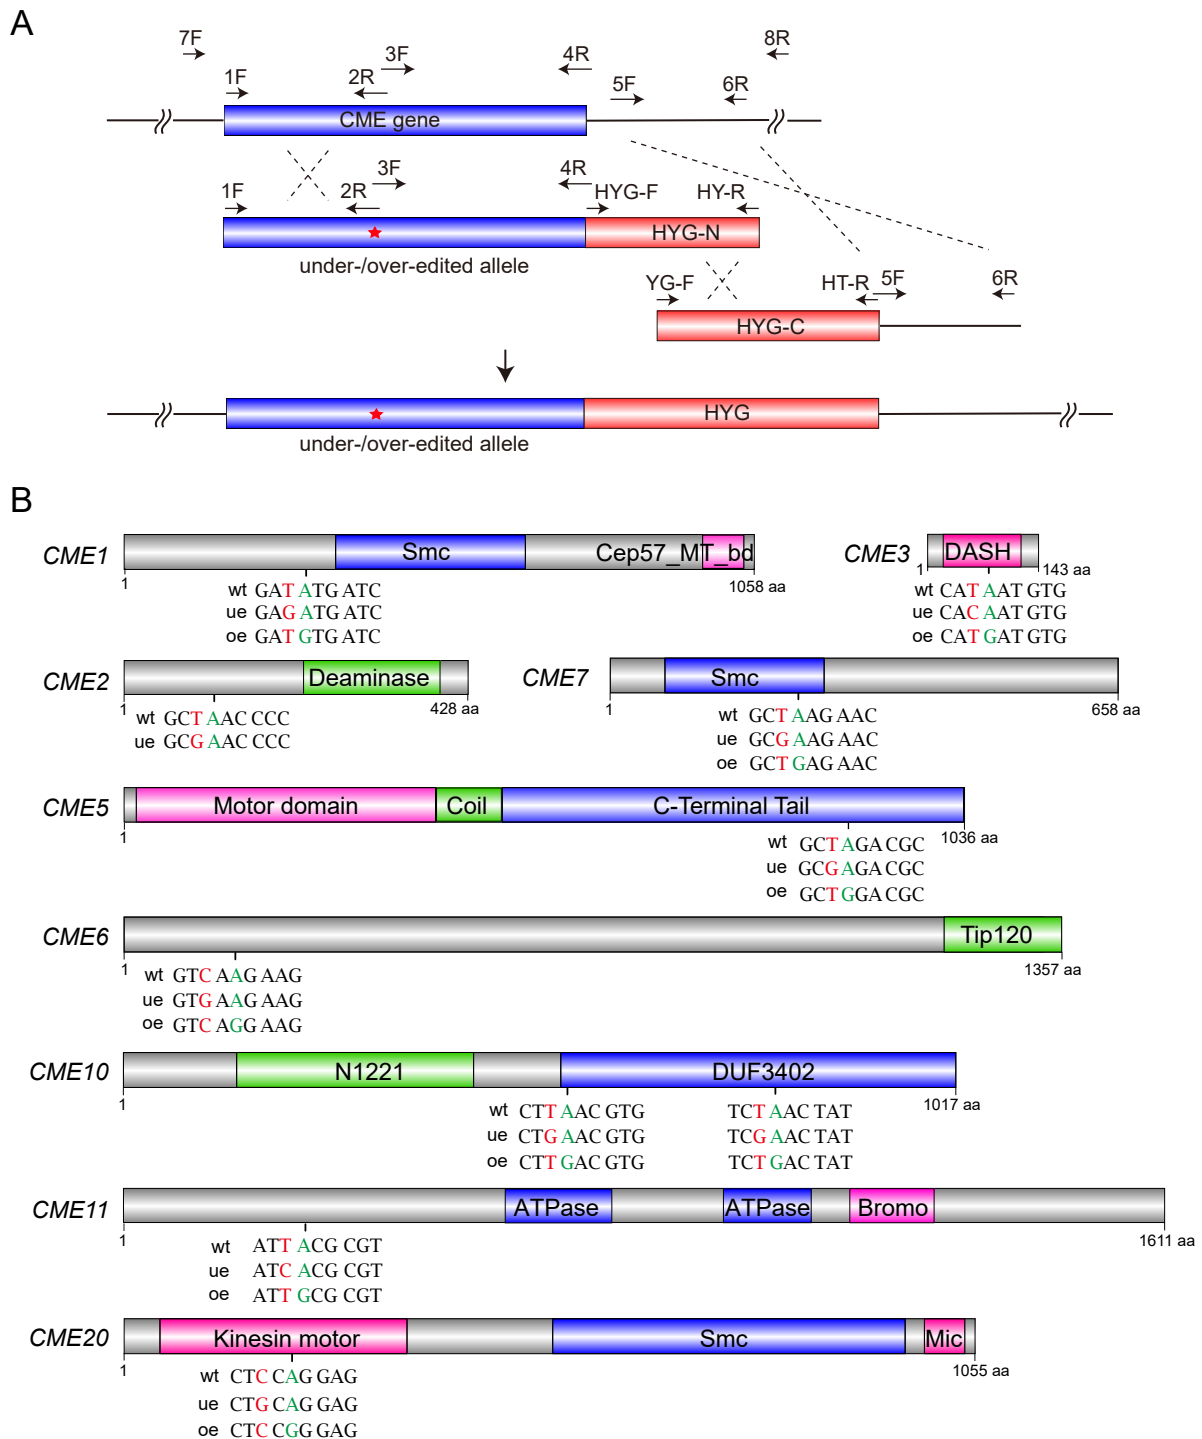

**Fig. S3.** Schematic representation of site-directed mutagenesis strategies for CME sites. (A) Graphical representation of the mutagenesis strategy used for CME sites. The hygromycin-resistance gene (HYG) is the selectable marker. Allelic fragments with desired mutations (marked with a red star) were generated by overlapping PCR. Locations of PCR primers (F, forward and R, reverse) are indicated. (B) Conserved domains and sequences of edited codons and 5' and 3' nearest-neighboring codons of *CME* genes. The editing and mutated sites are marked in green and red, respectively, for wild type (wt), under-edited (ue), and over-edited (oe) alleles. Abbreviations for domain names: Smc, chromosome segregation ATPase; Cep57\_MT\_bd, centrosome microtubule-binding domain of Cep57; DASH, DASH complex subunit Dad2; Deaminase, cytosine deaminases domain; Motor domain, Kinesin motor domain of KIP3-like subgroup; Coil, coiled-coil domain; C-terminal Tail, the C-terminal tail domain of KIP3-like subgroup; Tip120, TATA-binding protein interacting domain; N1221, N1221-like protein; DUF3402, a domain of unknown function; Mic, microtub\_bind domain; ATPase, AAA+-type ATPase; Bromo, the bromodomain of TBP7\_like subfamily; Kinesin motor, kinesin motor domain of BimC/Eg5 spindle pole proteins.



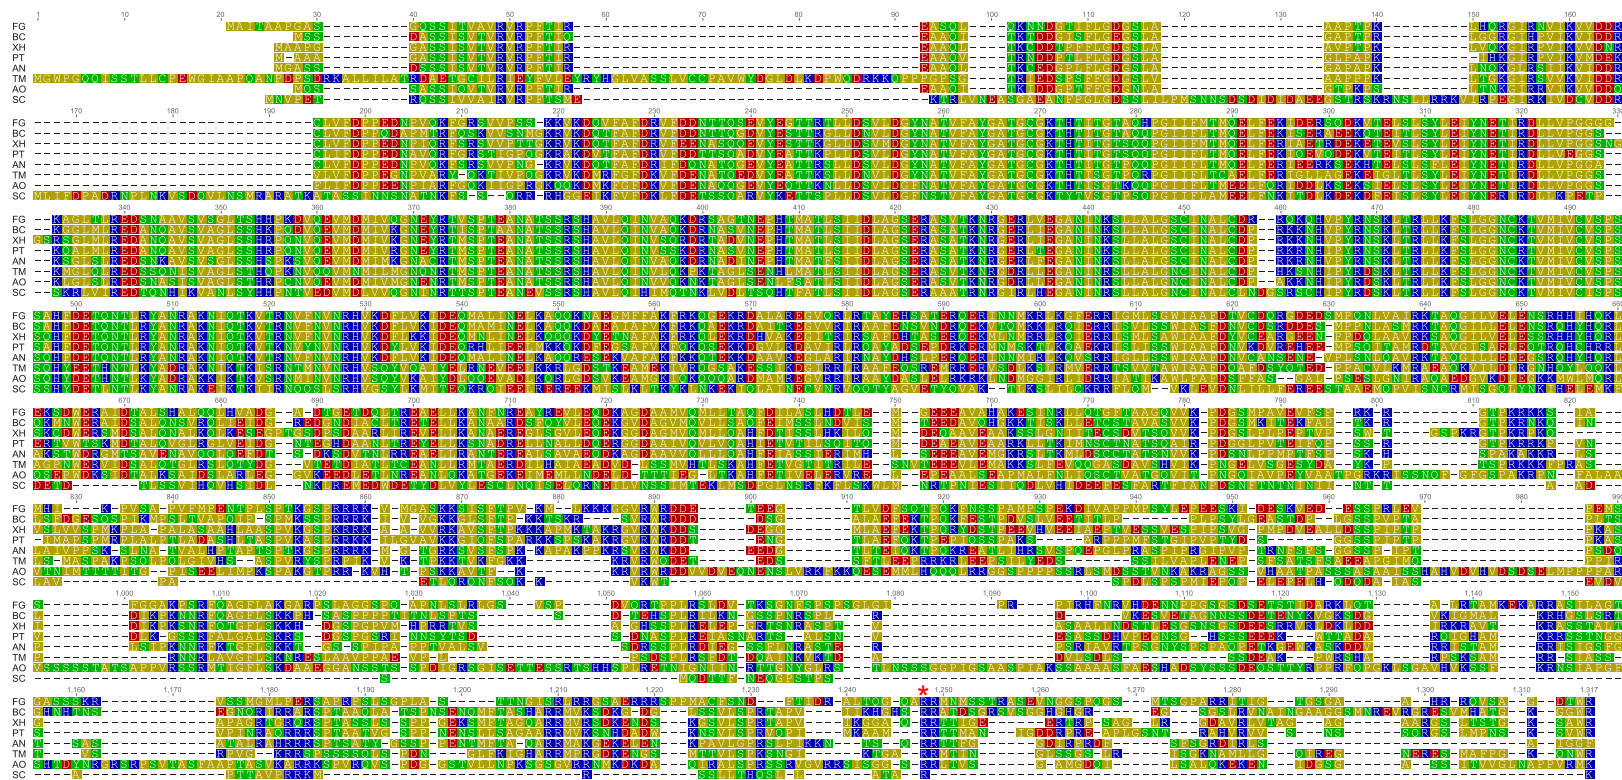

**Fig. S4.** Multiple sequence alignment of Cme5 and its orthologs in representative ascomycetes. Residues are colored according to their polarity. The CME site is marked with an asterisk (\*). Abbreviations: FG, *Fusarium graminearum*; BC, *Botrytis cinerea*; XH, *Xylona heveae*; PT, *Pyrenophora teres*; AN, *Aspergillus nidulans*; TM, *Tuber magnatum*; AO, *Arthrobotrys oligospora*, SC, *Saccharomyces cerevisiae*.

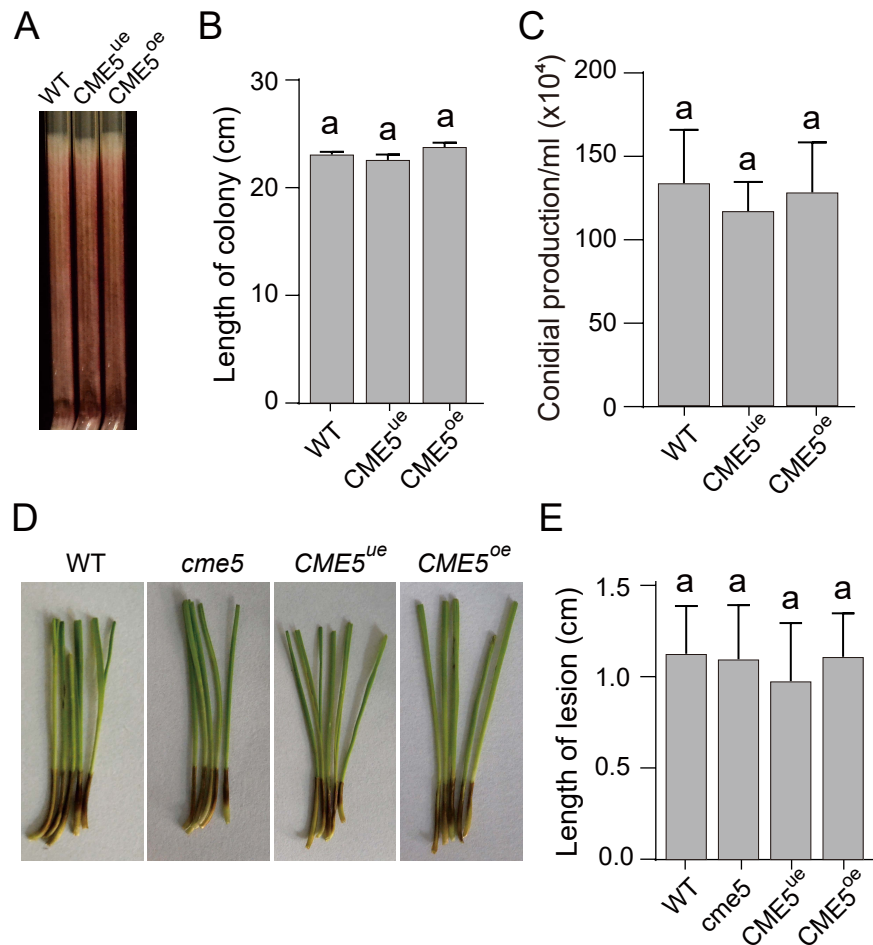

**Fig. S5.** Growth rate, conidial production, and virulence of the under-edited and over-edited mutants of *CME5*. (A) Fifteen-day-old PDA cultures of PH-1 (WT) and the under-edited (*CME5<sup>ue</sup>*) and over-edited (*CME5<sup>oe</sup>*) mutants in race tubes. (B) Length of the colony in race tubes. (C) Conidial production of the marked strains in 5-day-old CMC cultures. (D) Wheat coleoptiles inoculated with conidia of the marked strains were photographed at 7 days post-inoculation. (E) The length of lesion on infected wheat coleoptiles. Mean and standard deviation were calculated with data from three independent repeats ( $n = 3$ ) for (B) and (C) and at least five independent repeats ( $n > 5$ ) for (E). The same letters indicate no significant differences based on one-way ANOVA followed by Turkey's multiple range test ( $P > 0.05$ ).

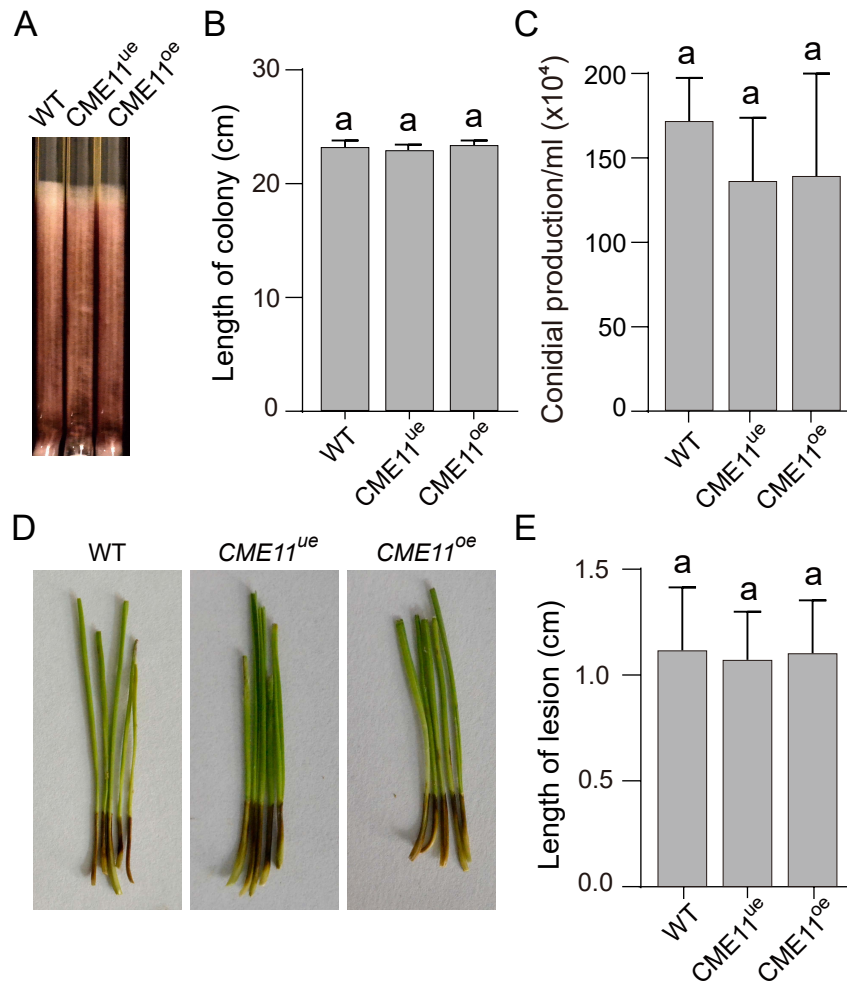

**Fig. S6.** Growth rate, conidial production, and virulence of the under-edited and over-edited mutants of *CME11*. (A) Fifteen-day-old PDA cultures of the wild-type PH-1 (WT) and the under-edited (*CME11<sup>ue</sup>*) and over-edited (*CME11<sup>oe</sup>*) mutants in race tubes. (B) Length of the colony in race tubes. (C) Conidial production of the marked strains in 5-day-old CMC cultures. (D) Wheat coleoptiles inoculated with conidia of the marked strains were photographed at 7 days post-inoculation. (E) The length of lesion on infected wheat coleoptiles. Mean and standard deviation were calculated with data from three independent repeats ( $n = 3$ ) for (B) and (C) and at least five independent repeats ( $n > 5$ ) for (E). The same letters indicate no significant differences based on one-way ANOVA followed by Turkey's multiple range test ( $P > 0.05$ ).

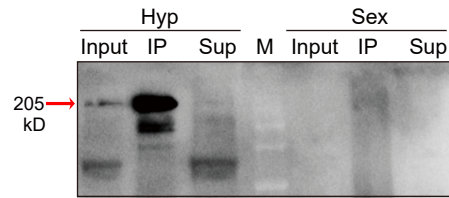

**Fig. S7.** Western blots of total proteins (Input), proteins eluted from anti-GFP affinity beads (IP), and supernatant solution (Sup) from 16-h hyphae (Hyp) or 7-dpf perithecia (Sex) of the transformant expressing *CME11*-GFP were detected by the anti-GFP antibody. The expected size (205 kD) of the Cme11-GFP protein is indicated.





**Table S1.** Information of 21 CME genes containing 22 CME sites with editing levels of  $\geq 50\%$  in both *F. graminearum* and *N. crassa*.

| <i>F. graminearum</i> |           |                     |                    | <i>N. crassa</i> |          |                     |                    | <i>S. cerevisiae</i> | <i>S. pombe</i>   |
|-----------------------|-----------|---------------------|--------------------|------------------|----------|---------------------|--------------------|----------------------|-------------------|
| Gene name             | Gene ID   | Editing site in CDS | Editing level (%)* | Gene name        | Gene ID  | Editing site in CDS | Editing level (%)* | Gene name            | Gene name         |
| <i>CME-1</i>          | FG1G04370 | 967                 | 91                 | <i>kpr-14</i>    | NCU03225 | 1033                | 91                 | -                    | -                 |
| <i>CME-2</i>          | FG1G22250 | 289                 | 65                 | -                | NCU01725 | 229                 | 84                 | <i>TAD3</i>          | <i>tad3</i>       |
| <i>CME-3</i>          | FG1G23600 | 244                 | 54                 | <i>dash-3</i>    | NCU01841 | 229                 | 50                 | <i>DAD2</i>          | <i>dad2</i>       |
| <i>CME-4</i>          | FG1G28230 | 310                 | 52                 | <i>gpr-2</i>     | NCU04626 | 344                 | 53                 | -                    | -                 |
| <i>CME-5</i>          | FG3G02660 | 2956                | 71                 | <i>kin-8</i>     | NCU06144 | 3670                | 77                 | <i>KIP3</i>          | <i>klp5, klp6</i> |
| <i>CME-6</i>          | FG3G17740 | 683                 | 67                 | -                | NCU08875 | 647                 | 67                 | -                    | <i>knd1</i>       |
| <i>CME-7</i>          | FG3G19720 | 670                 | 76                 | -                | NCU09481 | 757                 | 55                 | -                    | -                 |
| <i>CME-8</i>          | FG3G21370 | 1202                | 55                 | <i>cac-1</i>     | NCU04198 | 1238                | 54                 | -                    | -                 |
| <i>CME-9</i>          | FG3G21560 | 865                 | 69                 | -                | NCU03709 | 211                 | 84                 | <i>HMX1</i>          | -                 |
| <i>CME-10</i>         | FG4G11660 | 1903                | 83                 | <i>ham-2</i>     | NCU03727 | 1984                | 82                 | <i>FAR11</i>         | <i>far11</i>      |
| <i>CME-10</i>         | FG4G11660 | 2194                | 57                 | <i>ham-2</i>     | NCU03727 | 2266                | 84                 | <i>FAR11</i>         | <i>far11</i>      |
| <i>CME-11</i>         | FG4G12740 | 910                 | 50                 | <i>dim-1</i>     | NCU06484 | 1027                | 63                 | <i>YTA7</i>          | <i>abo1, abo2</i> |
| <i>CME-12</i>         | FG2G11430 | 794                 | 50                 | -                | NCU01998 | 809                 | 52                 | -                    | -                 |
| <i>CME-13</i>         | FG2G12190 | 700                 | 82                 | <i>gh81-1</i>    | NCU07076 | 484                 | 65                 | <i>DSE4, ACF2</i>    | <i>eng1, eng2</i> |
| <i>CME-14</i>         | FG4G25980 | 181                 | 80                 | <i>ldh-4</i>     | NCU00780 | 226                 | 78                 | -                    | -                 |
| <i>CME-15</i>         | FG4G25530 | 703                 | 98                 | -                | NCU09929 | 718                 | 83                 | -                    | -                 |
| <i>CME-16</i>         | FG4G24350 | 469                 | 70                 | <i>cly-1</i>     | NCU06361 | 463                 | 65                 | -                    | -                 |
| <i>CME-17</i>         | FG1G41810 | 916                 | 59                 | -                | NCU03994 | 1291                | 80                 | -                    | -                 |
| <i>CME-18</i>         | FG1G41840 | 604                 | 57                 | -                | NCU05809 | 784                 | 89                 | -                    | -                 |
| <i>CME-19</i>         | FG3G06430 | 250                 | 93                 | -                | NCU01182 | 349                 | 64                 | -                    | -                 |
| <i>CME-20</i>         | FG1G10370 | 470                 | 91                 | <i>kin-5</i>     | NCU00927 | 842                 | 69                 | <i>CIN8, KIP1</i>    | <i>cut7</i>       |
| <i>CME-21</i>         | FG1G23580 | 2374                | 67                 | -                | NCU01840 | 2488                | 67                 | -                    | -                 |

\*Editing levels in *F. graminearum* were from our previous study (1) calculated with RNA-seq data of perithecia (Sex) samples. Editing levels in *N. crassa* were the largest editing levels calculated with RNA-seq data of 3- to 6-dpf perithecia in our previous study (2).

**Table S2.** RNA-seq data used in this study.

| <b>Species</b>        | <b>Sample</b>            | <b>Accession number</b>             |
|-----------------------|--------------------------|-------------------------------------|
| <i>F. graminearum</i> | Conidia (Coni) of PH-1   | SRR2182470, SRR2182494, SRR12677105 |
| <i>F. graminearum</i> | Hyphae (Hyp) of PH-1     | SRR2182495, SRR2182497, SRR12677098 |
| <i>F. graminearum</i> | Perithecia (Sex) of PH-1 | SRR2182501, SRR2182499              |
| <i>F. graminearum</i> | 1-dpf perithecia of PH-1 | SRS16391626                         |
| <i>F. graminearum</i> | 2-dpf perithecia of PH-1 | SRS16391627                         |
| <i>F. graminearum</i> | 3-dpf perithecia of PH-1 | SRS16391628                         |
| <i>F. graminearum</i> | 4-dpf perithecia of PH-1 | SRS16391629                         |
| <i>F. graminearum</i> | 5-dpf perithecia of PH-1 | SRS16391630                         |
| <i>F. graminearum</i> | 6-dpf perithecia of PH-1 | SRS16391631                         |
| <i>F. graminearum</i> | 7-dpf perithecia of PH-1 | SRS16391632                         |
| <i>F. graminearum</i> | 8-dpf perithecia of PH-1 | SRS16391633                         |

**Table S3.** Strains used in this study.

| Strains                             | Brief description                                                                                                                                      | Reference  |
|-------------------------------------|--------------------------------------------------------------------------------------------------------------------------------------------------------|------------|
| PH-1                                | The wild-type strain                                                                                                                                   | (3)        |
| cme1-13, 16, TK12, TK13             | <i>CME1</i> deletion mutants of PH-1                                                                                                                   | This study |
| cme3-1, 2, TK9, TK11                | <i>CME3</i> deletion mutants of PH-1                                                                                                                   | This study |
| cme5-1, 5, TK9, TK11                | <i>CME5</i> deletion mutants of PH-1                                                                                                                   | This study |
| cme6-1, 2, TK19, TK20               | <i>CME6</i> deletion mutants of PH-1                                                                                                                   | This study |
| cme7-3, 4, TK9, TK10                | <i>CME7</i> deletion mutants of PH-1                                                                                                                   | This study |
| cme8-1, 2                           | <i>CME8</i> deletion mutants of PH-1                                                                                                                   | This study |
| cme9-1, 6, 8                        | <i>CME9</i> deletion mutants of PH-1                                                                                                                   | This study |
| cme10-4, 5, TK1, TK3                | <i>CME10</i> deletion mutants of PH-1                                                                                                                  | This study |
| cme11-1, 2, TK1, TK2                | <i>CME11</i> deletion mutants of PH-1                                                                                                                  | This study |
| cme12-6, 8                          | <i>CME12</i> deletion mutants of PH-1                                                                                                                  | This study |
| cme14-10, 11                        | <i>CME14</i> deletion mutants of PH-1                                                                                                                  | This study |
| cme15-8, 12                         | <i>CME15</i> deletion mutants of PH-1                                                                                                                  | This study |
| cme16-1, 7                          | <i>CME16</i> deletion mutants of PH-1                                                                                                                  | This study |
| cme19-8, 12                         | <i>CME19</i> deletion mutants of PH-1                                                                                                                  | This study |
| cme21-8, 7                          | <i>CME21</i> deletion mutants of PH-1                                                                                                                  | This study |
| cme1/ <i>CME1</i> -6, 4             | Complemented strains of <i>cme1</i> deletion mutants                                                                                                   | This study |
| cme3/ <i>CME3</i> -3                | Complemented strains of <i>cme3</i> deletion mutants                                                                                                   | This study |
| cme5/ <i>CME5</i> -1, 3             | Complemented strains of <i>cme5</i> deletion mutants                                                                                                   | This study |
| cme6/ <i>CME6</i> -5, 12            | Complemented strains of <i>cme6</i> deletion mutants                                                                                                   | This study |
| cme7/ <i>CME7</i> -9                | Complemented strains of <i>cme7</i> deletion mutants                                                                                                   | This study |
| cme10/ <i>CME10</i> -1, 2           | Complemented strains of <i>cme10</i> deletion mutants                                                                                                  | This study |
| cme11/ <i>CME11</i> -1, 6           | Complemented strains of <i>cme11</i> deletion mutants                                                                                                  | This study |
| <i>CME1</i> <sup>ue</sup> -1, 4     | Under-edited mutants of <i>CME1</i>                                                                                                                    | This study |
| <i>CME2</i> <sup>ue</sup> -3, 9     | Under-edited mutants of <i>CME2</i>                                                                                                                    | This study |
| <i>CME3</i> <sup>ue</sup> -2, 7     | Under-edited mutants of <i>CME3</i>                                                                                                                    | This study |
| <i>CME5</i> <sup>ue</sup> -4, 12    | Under-edited mutants of <i>CME5</i>                                                                                                                    | This study |
| <i>CME6</i> <sup>ue</sup> -2, 4     | Under-edited mutants of <i>CME6</i>                                                                                                                    | This study |
| <i>CME7</i> <sup>ue</sup> -1, 3     | Under-edited mutants of <i>CME7</i>                                                                                                                    | This study |
| <i>CME10</i> <sup>ue1</sup> -2, 5   | Under-edited mutants of the first CME site of <i>CME10</i>                                                                                             | This study |
| <i>CME10</i> <sup>ue2</sup> -2, 15  | Under-edited mutants of the second CME site of <i>CME10</i>                                                                                            | This study |
| <i>CME10</i> <sup>ue1,2</sup> -2, 6 | Under-edited mutants of double CME sites of <i>CME10</i>                                                                                               | This study |
| <i>CME11</i> <sup>ue</sup> -20, 18  | Under-edited mutants of <i>CME11</i>                                                                                                                   | This study |
| <i>CME20</i> <sup>ue</sup> -7, 10   | Under-edited mutants of <i>CME20</i>                                                                                                                   | This study |
| <i>CME1</i> <sup>oe</sup> -5, 6     | Over-edited mutants of <i>CME1</i>                                                                                                                     | This study |
| <i>CME3</i> <sup>oe</sup> -1, 2     | Over-edited mutants of <i>CME3</i>                                                                                                                     | This study |
| <i>CME5</i> <sup>oe</sup> -25, 26   | Over-edited mutants of <i>CME5</i>                                                                                                                     | This study |
| <i>CME6</i> <sup>oe</sup> -5, 6     | Over-edited mutants of <i>CME6</i>                                                                                                                     | This study |
| <i>CME7</i> <sup>oe</sup> -2, 4     | Over-edited mutants of <i>CME7</i>                                                                                                                     | This study |
| <i>CME10</i> <sup>oe1</sup> -7, 8   | Over-edited mutants of the first CME site of <i>CME10</i>                                                                                              | This study |
| <i>CME10</i> <sup>oe2</sup> -5, 6   | Over-edited mutants of the second CME site of <i>CME10</i>                                                                                             | This study |
| <i>CME10</i> <sup>oe1,2</sup> -7, 8 | Over-edited mutants of double CME sites of <i>CME10</i>                                                                                                | This study |
| <i>CME11</i> <sup>oe</sup> -10, 5   | Over-edited mutants of <i>CME11</i>                                                                                                                    | This study |
| <i>CME20</i> <sup>oe</sup> -1, 3    | Over-edited mutants of <i>CME20</i>                                                                                                                    | This study |
| <i>CME11</i> -CK-12                 | The control check strain containing the same selectable marker inserted at the <i>CME11</i> locus but without mutations at <i>CME11</i> coding regions | This study |
| <i>CME11</i> <sup>ue-oe</sup> -6,10 | Mutants expressed both under-edited and over-edited alleles of <i>CME11</i>                                                                            | This study |
| <i>CME11</i> -pDL2-5                | <i>CME11</i> -GFP ectopic expression strain                                                                                                            | This study |

**Table S4.** Phenotypes of deletion mutants of 21 *CME* genes in *F. graminearum*.

| Gene ID   | Gene name    | Deletion <sup>a</sup> | Mycelial growth <sup>b</sup> | Conidiation <sup>b</sup> | Perithecia          | Ascus formation <sup>b</sup> | Ascospore formation <sup>b</sup> | Reference  |
|-----------|--------------|-----------------------|------------------------------|--------------------------|---------------------|------------------------------|----------------------------------|------------|
| FG1G04370 | <i>CME1</i>  | Y                     | 97.6%                        | 99.6%                    | Reduced cirrhi      | 44.5%                        | 4.0%                             | This study |
| FG1G22250 | <i>CME2</i>  | N                     | N/A                          | N/A                      | N/A                 | N/A                          | N/A                              | This study |
| FG1G23600 | <i>CME3</i>  | Y                     | 92.1%                        | 111.4%                   | Reduced cirrhi      | 60.8%                        | 20.9%                            | This study |
| FG1G28230 | <i>CME4</i>  | Y                     | 100.3%                       | 92.2%                    | Normal              | N/A                          | N/A                              | (4)        |
| FG3G02660 | <i>CME5</i>  | Y                     | 97.7%                        | 90.7%                    | Reduced cirrhi      | 49.7%                        | 5.9%                             | This study |
| FG3G17740 | <i>CME6</i>  | Y                     | 81.1%                        | 102.3%                   | Smaller & no cirrhi | No elongated asci            | N/A                              | This study |
| FG3G19720 | <i>CME7</i>  | Y                     | 64.0%                        | 89.9%                    | Reduced cirrhi      | 34.9%                        | 0.1%                             | This study |
| FG3G21370 | <i>CME8</i>  | Y                     | 92.6%                        | Normal                   | Normal              | Normal                       | Normal                           | This study |
| FG3G21560 | <i>CME9</i>  | Y                     | 98.7%                        | Normal                   | Normal              | Normal                       | Normal                           | This study |
| FG4G11660 | <i>CME10</i> | Y                     | 31.2%                        | 12.0%                    | No perithecia       | N/A                          | N/A                              | This study |
| FG4G12740 | <i>CME11</i> | Y                     | 30.5%                        | 1.9%                     | No perithecia       | N/A                          | N/A                              | This study |
| FG2G11430 | <i>CME12</i> | Y                     | 97.5%                        | Normal                   | Normal              | Normal                       | Normal                           | This study |
| FG2G12190 | <i>CME13</i> | Y                     | 76.7%                        | Normal                   | Normal              | Normal                       | Normal                           | (5)        |
| FG4G25980 | <i>CME14</i> | Y                     | 99.9%                        | Normal                   | Normal              | Normal                       | Normal                           | This study |
| FG4G25530 | <i>CME15</i> | Y                     | 98.0%                        | Normal                   | Normal              | Normal                       | Normal                           | This study |
| FG4G24350 | <i>CME16</i> | Y                     | 95.5%                        | Normal                   | Normal              | Normal                       | Normal                           | This study |
| FG1G41810 | <i>CME17</i> | Y                     | 0-30%                        | Normal                   | Normal              | Normal                       | Normal                           | (6)        |
| FG1G41840 | <i>CME18</i> | Y                     | 91-100%                      | Normal                   | Normal              | Normal                       | Normal                           | (6)        |
| FG3G06430 | <i>CME19</i> | Y                     | 100.1%                       | Normal                   | Normal              | Normal                       | Normal                           | This study |
| FG1G10370 | <i>CME20</i> | N                     | N/A                          | N/A                      | N/A                 | N/A                          | N/A                              | This study |
| FG1G23580 | <i>CME21</i> | Y                     | 100.6%                       | Normal                   | Normal              | Normal                       | Normal                           | This study |

<sup>a</sup> Y and N represent deleted genes and undeleted genes, respectively.

<sup>b</sup> Percentage of average growth rates on PDA, conidial production in CMC, number of asci per perithecium, asci with eight ascospores for each mutant relative to the wild-type PH-1. Normal, no visible defects; N/A, not applicable.

## SI References

1. H. Liu *et al.*, Genome-wide A-to-I RNA editing in fungi independent of ADAR enzymes. *Genome Res* **26**, 499-509 (2016).
2. H. Liu *et al.*, A-to-I RNA editing is developmentally regulated and generally adaptive for sexual reproduction in *Neurospora crassa*. *Proc Natl Acad Sci U S A* **114**, E7756-E7765 (2017).
3. C. A. Cuomo *et al.*, The *Fusarium graminearum* genome reveals a link between localized polymorphism and pathogen specialization. *Science* **317**, 1400-1402 (2007).
4. C. Jiang *et al.*, An expanded subfamily of G-protein-coupled receptor genes in *Fusarium graminearum* required for wheat infection. *Nat Microbiol* **4**, 1582-1591 (2019).
5. C. Hao *et al.*, The meiosis-specific APC activator FgAMA1 is dispensable for meiosis but important for ascosporeogenesis in *Fusarium graminearum*. *Molecular microbiology* **111**, 1245-1262 (2019).
6. H. Son *et al.*, A phenome-based functional analysis of transcription factors in the cereal head blight fungus, *Fusarium graminearum*. *PLoS Pathog* **7**, e1002310 (2011).
