# Supplementary material for: Experimental evidence for the functional importance and adaptive advantage of A-to-I RNA editing in fungi
Source: PubMed Central journal article supplement — Proc Natl Acad Sci U S A. 2023 Mar 14;120(12):e2219029120. doi: 10.1073/pnas.2219029120 (PMC10041177; doi:10.1073/pnas.2219029120), 2023-03-14
Supplement: pnas.2219029120.sd01.pdf [file pnas.2219029120.sd01.pdf]

**Dataset S1.** Orthologs of *CME5* and *CME11* in different taxa of ascomycetes and basidiomycetes.

| <b>Taxa</b>    | <b>Species</b>                             | <b>Accession numbers of <i>CME5</i> orthologs</b> | <b>Accession numbers of <i>CME11</i> orthologs</b> |
|----------------|--------------------------------------------|---------------------------------------------------|----------------------------------------------------|
| Dothideomycete | <i>Coniosporium apollinis</i>              | EON68481                                          | EON63298                                           |
|                | <i>Rachicladosporium sp. CCFEE 5018</i>    | OQO27135                                          | OQO16684                                           |
|                | <i>Rachicladosporium sp. CCFEE 5018</i>    | OQO27895                                          | OQO17400                                           |
|                | <i>Rachicladosporium antarcticum</i>       | OQO14233                                          | OQO12922                                           |
|                | <i>Rachicladosporium antarcticum</i>       | OQO14919                                          | OQO08508                                           |
|                | <i>Neofusicoccum parvum</i>                | EOD48589                                          | EOD43014                                           |
|                | <i>Macrophomina phaseolina</i>             | EKG12957                                          | EKG18279                                           |
|                | <i>Aureobasidium melanogenum</i>           | KEQ63594                                          | KEQ60637                                           |
|                | <i>Hortaea werneckii</i>                   | OTA36491                                          | OTA32154                                           |
|                | <i>Hortaea werneckii</i>                   | OTA22012                                          | OTA33897                                           |
|                | <i>Acidomyces richmondensis</i>            | KYG42476                                          | KYG49134                                           |
|                | <i>Baudoinia panamericana</i>              | EMC99720                                          | EMC94550                                           |
|                | <i>Zymoseptoria tritici</i>                | Mycgr3P83356                                      | Mycgr3P99817                                       |
|                | <i>Zymoseptoria brevis</i>                 | KJY00759                                          | KJY02027                                           |
|                | <i>Sphaerulina musiva</i>                  | EMF14368                                          | EMF16273                                           |
|                | <i>Cercospora berteroae</i>                | PPJ56840                                          | PPJ53882                                           |
|                | <i>Pseudocercospora fijiensis</i>          | EME83598                                          | EME89706                                           |
|                | <i>Pseudocercospora musae</i>              | KXT12689                                          | KXT13491                                           |
|                | <i>Ramularia colloN/Acygni</i>             | CZT25346                                          | CZT20566                                           |
|                | <i>Dothistroma septosporum</i>             | EME46807                                          | EME48545                                           |
|                | <i>Elsinoe australis</i>                   | PSK60295                                          | PSK51607                                           |
|                | <i>Paraphaeosphaeria sporulosa</i>         | OAG02111                                          | OAG06601                                           |
|                | <i>Corynespora cassiicola Philippines</i>  | PSN65146                                          | PSN70236                                           |
|                | <i>Clohesyomyces aquaticus</i>             | ORY06368                                          | ORY19717                                           |
|                | <i>Stagonospora sp. SRC1IsM3a</i>          | OAK94245                                          | OAL05880                                           |
|                | <i>Pyrenochaeta sp. DS3sAY3a</i>           | OAL57311                                          | OAL56626                                           |
|                | <i>Periconia macrospinosa str. DSE2036</i> | PVH93477                                          | PVH93121                                           |
|                | <i>Phaeosphaeria nodorum</i>               | SNOT_193                                          | SNOT_00680                                         |
|                | <i>Bipolaris oryzae</i>                    | EUC50656                                          | EUC47079                                           |
|                | <i>Bipolaris maydis C5</i>                 | EMD95718                                          | EMD89665                                           |
|                | <i>Exserohilum turcica</i>                 | EOA86681                                          | EOA81395                                           |
|                | <i>Stemphylium lycopersici</i>             | KNG44051                                          | KNG47499                                           |
|                | <i>Pyrenophora triticiN/Arepentis</i>      | EDU43317                                          | EDU50151                                           |
|                | <i>Pyrenophora teres</i>                   | EFQ88076                                          | EFQ90217                                           |
|                | <i>Alternaria alternata</i>                | OAG17171                                          | OAG26302                                           |
|                | <i>Epicoccum nigrum</i>                    | OSS53010                                          | OSS44484                                           |
|                | <i>Ascochyta rabiei</i>                    | KZM25753                                          | KZM19646                                           |
|                | <i>Leptosphaeria maculans</i>              | CBX91416                                          | CBX94563                                           |

| <b>Taxa</b>                  | <b>Species</b>                            | <b>Accession numbers of CME5 orthologs</b> | <b>Accession numbers of CME11 orthologs</b> |
|------------------------------|-------------------------------------------|--------------------------------------------|---------------------------------------------|
| Eurotiomycetes               | <i>Paracoccidioides brasiliensis Pb18</i> | EEH48337                                   | EEH46332                                    |
|                              | <i>Trichophyton equinum</i>               | EGE01593                                   | EGE01263                                    |
|                              | <i>Microsporium canis</i>                 | EEQ32797                                   | EEQ35025                                    |
|                              | <i>Nannizzia gypsea</i>                   | EFQ99700                                   | EFR01917                                    |
|                              | <i>Ascosphaera apis</i>                   | KZZ88599                                   | KZZ93161                                    |
|                              | <i>Uncinocarpus reesii</i>                | EEP76913                                   | EEP76633                                    |
|                              | <i>Coccidioides posadasii</i>             | EFW17133                                   | EFW22203                                    |
|                              | <i>Coccidioides immitis</i>               | KMU89031                                   | KMU91954                                    |
|                              | <i>Polytolypa hystricis</i>               | PGH01080                                   | PGH18498                                    |
|                              | <i>Helicocarpus griseus</i>               | PGG97926                                   | PGG99412                                    |
|                              | <i>Emmonsia crescens</i>                  | KKZ63947                                   | KKZ63983                                    |
|                              | <i>Blastomyces dermatitidis</i>           | EEQ86614                                   | EEQ88888                                    |
|                              | <i>Histoplasma capsulatum</i>             | AGR95_023460.mR<br>NAN/Ap1                 | AGR95_069230.mR<br>NAN/Ap1                  |
|                              | <i>Endocarpon pusillum</i>                | ERF75547                                   | ERF74480                                    |
|                              | <i>Phaeomoniella chlamydospora</i>        | KKY24463                                   | KKY16412                                    |
|                              | <i>Cyphellophora europaea</i>             | ETN37575                                   | ETN37401                                    |
|                              | <i>Rhinocladiella mackenziei</i>          | KIX04475                                   | KIX01800                                    |
|                              | <i>Fonsecaea erecta</i>                   | OAP56258                                   | OAP63462                                    |
|                              | <i>Exophiala aquamarina</i>               | KEF56573                                   | KEF59726                                    |
|                              | <i>Capronia epimyces</i>                  | EXJ87147                                   | EXJ86952                                    |
|                              | <i>Cladophialophora carrionii</i>         | OCT50111                                   | OCT54142                                    |
|                              | <i>Phialophora americana</i>              | KIW70394                                   | KIW65780                                    |
|                              | <i>Elaphomyces granulatus</i>             | OXV10950                                   | OXV09320                                    |
|                              | <i>Paecilomyces variotii</i>              | GAD93367                                   | GAD92654                                    |
|                              | <i>Rasamsonia emersonii</i>               | KKA25105                                   | KKA20758                                    |
|                              | <i>Talaromyces atroroseus</i>             | OKL56556                                   | OKL56866                                    |
|                              | <i>Talaromyces stipitatus</i>             | EED16571                                   | EED16017                                    |
|                              | <i>Talaromyces islandicus</i>             | CRG90200                                   | CRG92196                                    |
|                              | <i>Penicillium zonata</i>                 | OJJ51293                                   | OJJ46286                                    |
|                              | <i>Penicillium antarcticum</i>            | OQD87053                                   | OQD79521                                    |
|                              | <i>Aspergillus oryzae</i>                 | BAE62872                                   | BAE65529                                    |
|                              | <i>Aspergillus fumigatus</i>              | EDP53975                                   | EDP48879                                    |
|                              | <i>Aspergillus clavatus</i>               | EAU11443                                   | EAU15106                                    |
| <i>Aspergillus terreus</i>   | EAU29769                                  | EAU38686                                   |                                             |
| <i>Aspergillus flavus</i>    | EED49177                                  | EED45297                                   |                                             |
| <i>Aspergillus fischeri</i>  | EAU23982                                  | EAU20078                                   |                                             |
| <i>Aspergillus fumigatus</i> | EAL87412                                  | EAL85196                                   |                                             |
| <i>Aspergillus nidulans</i>  | CBF77358                                  | CBF84862                                   |                                             |
| <i>Aspergillus niger</i>     | CAK39573                                  | CAK42981                                   |                                             |
| Leotiomyces                  | <i>Oidiodendron maius</i>                 | KIM97879                                   | KIN05963                                    |
|                              | <i>Cadophora sp. DSE1049</i>              | PVH87084                                   | PVH85079                                    |

| Taxa                | Species                                          | Accession numbers of <i>CME5</i> orthologs | Accession numbers of <i>CME11</i> orthologs |
|---------------------|--------------------------------------------------|--------------------------------------------|---------------------------------------------|
|                     | <i>Pezoloma ericae</i>                           | PMD20874                                   | PMD24061                                    |
|                     | <i>Rutstroemia</i> sp. NJRN/A2017a<br><i>BBW</i> | PQE20415                                   | PQE13053                                    |
|                     | <i>Glarea lozoyensis</i>                         | EPE30740                                   | EPE36149                                    |
|                     | <i>Rhynchosporium agropyri</i>                   | CZT03001                                   | CZS90149                                    |
|                     | <i>Amorphotheca resinae</i>                      | PSS08679                                   | PSS22337                                    |
|                     | <i>Diplocarpon rosae</i>                         | PBP20796                                   | N/A                                         |
|                     | <i>Diplocarpon rosae</i>                         | PBP24246                                   | PBP19606                                    |
|                     | <i>Marssonina brunnea</i>                        | N/A                                        | EKD21139                                    |
|                     | <i>Phialocephala subalpina</i>                   | CZR55441                                   | CZR54323                                    |
|                     | <i>Phialocephala scopiformis</i>                 | KUJ24560                                   | KUJ20907                                    |
|                     | <i>Botrytis cinerea</i>                          | Bcin05p07900.1                             | Bcin10p02810.1                              |
|                     | <i>Sclerotinia sclerotiorum</i>                  | EDN95887                                   | EDN97785                                    |
|                     | <i>Erysiphe pulchra</i>                          | POS84597                                   | POS83356                                    |
|                     | <i>Erysiphe necator</i>                          | KHJ32308                                   | KHJ31349                                    |
|                     | <i>Blumeria graminis</i>                         | BLGH_00182N/AmR<br>NAN/A1                  | BLGH_01417N/AmR<br>NAN/A1                   |
| Sordariomy<br>cetes | <i>Madurella mycetomatis</i>                     | KXX81049                                   | KXX82535                                    |
|                     | <i>Chaetomium globosum</i>                       | EAQ83440                                   | EAQ89113                                    |
|                     | <i>Sordaria macrospora</i> kN/Ahell              | CCC13153                                   | CCC12246                                    |
|                     | <i>Neurospora crassa</i>                         | EAA30770                                   | EAA27888                                    |
|                     | <i>Acremonium chrysogenum</i>                    | KFH43051                                   | KFH48931                                    |
|                     | <i>Torribiella hemipterigena</i>                 | CEJ94304                                   | CEJ89505                                    |
|                     | <i>Pochonia chlamydosporia</i>                   | OAQ62666                                   | OAQ70182                                    |
|                     | <i>Ustilagoidea virens</i>                       | KDB13237                                   | KDB11749                                    |
|                     | <i>Claviceps purpurea</i>                        | CCE28830                                   | CCE31420                                    |
|                     | <i>Moelleriella libera</i>                       | KZZ90188                                   | OAA33136                                    |
|                     | <i>Metarhizium rileyi</i>                        | OAA40635                                   | OAA34546                                    |
|                     | <i>Metarhizium acridum</i>                       | EFY84965                                   | EFY84128                                    |
|                     | <i>Stachybotrys chartarum</i>                    | KFA72099                                   | KFA79519                                    |
|                     | <i>Stachybotrys chlorohalonata</i>               | KFA61828                                   | KFA62227                                    |
|                     | <i>Beauveria bassiana</i>                        | BB8028_0003g0956<br>0.1                    | BB8028_0003g11130<br>.1                     |
|                     | <i>Ophiocordyceps camponoti</i> N/Arufipedis     | PHH77649                                   | PHH69955                                    |
|                     | <i>Ophiocordyceps australis</i>                  | PHH82834                                   | PHH75571                                    |
|                     | <i>Hirsutella minnesotensis</i>                  | KJZ75477                                   | KJZ72881                                    |
|                     | <i>Drechmeria coniospora</i>                     | KYK57970                                   | KYK60126                                    |
|                     | <i>Tolypocladium ophioglossoides</i>             | KND91043                                   | KND95273                                    |
|                     | <i>Tolypocladium paradoxum</i>                   | POR39685                                   | POR32835                                    |
|                     | <i>Tolypocladium capitatum</i>                   | PNY26900                                   | PNY26959                                    |
|                     | <i>Purpureocillium lilacinum</i>                 | OAQ76647                                   | OAQ84749                                    |
|                     | <i>Escovopsis weberi</i>                         | KOS18186                                   | KOS17861                                    |

| <b>Taxa</b> | <b>Species</b>                    | <b>Accession numbers of CME5 orthologs</b> | <b>Accession numbers of CME11 orthologs</b> |
|-------------|-----------------------------------|--------------------------------------------|---------------------------------------------|
|             | <i>Trichoderma asperellum</i>     | PTB43695                                   | PTB46436                                    |
|             | <i>Trichoderma atroviride</i>     | EHK49299                                   | EHK41242                                    |
|             | <i>Trichoderma reesei</i>         | EGR52968                                   | EGR50657                                    |
|             | <i>Trichoderma virens</i>         | EHK24198                                   | EHK16637                                    |
|             | <i>Neonectria ditissima</i>       | KPM35941                                   | KPM34063                                    |
|             | <i>Fusarium solani</i>            | NechaP85384                                | NechaP123140                                |
|             | <i>Fusarium verticillioides</i>   | N/A                                        | FVEG_05365T0                                |
|             | <i>Fusarium verticillioides</i>   | FVEG_03611T0                               | FVEG_05364T0                                |
|             | <i>Fusarium pseudograminearum</i> | EKJ75811                                   | EKJ76608                                    |
|             | <i>Fusarium culmorum</i>          | FCUL_07024.1N/Am<br>RNAN/A1                | FCUL_10342.1N/Am<br>RNAN/A1                 |
|             | <i>Fusarium oxysporum</i>         | FOXG_05734P0                               | FOXG_02195P0                                |
|             | <i>Fusarium fujikuroi</i>         | CCT64850                                   | CCT66230                                    |
|             | <i>Fusarium graminearum</i>       | FGRAMPH1_01T165<br>71                      | FGRAMPH1_01T242<br>73                       |
|             | <i>Coniochaeta ligniaria</i>      | OIW23890                                   | OIW33498                                    |
|             | <i>Phaeoacremonium minimum</i>    | EON96199                                   | EOO04407                                    |
|             | <i>Coniella lustricola</i>        | PSR77148                                   | PSS00960                                    |
|             | <i>Diaporthe ampelina</i>         | KKY33050                                   | KKY33820                                    |
|             | <i>Valsa mali var. pyri</i>       | KUI57403                                   | KUI60091                                    |
|             | <i>Magnaporthe oryzae</i>         | mRNA_M_BR32_Eu<br>Gene_00094361N/A<br>p1   | N/A                                         |
|             | <i>Magnaporthe oryzae</i>         | MGG_06839T0                                | MGG_06380T0                                 |
|             | <i>Gaeumannomyces tritici</i>     | EJT82518                                   | EJT74344                                    |
|             | <i>Magnaporthe poae</i>           | N/A                                        | MAPG_07986T0                                |
|             | <i>Eutypa lata UCREL1</i>         | EMR63320                                   | EMR70606                                    |
|             | <i>Pestalotiopsis fici</i>        | ETS75092                                   | ETS79870                                    |
|             | <i>Pseudomassariella vexata</i>   | ORY57806                                   | ORY70114                                    |
|             | <i>Hypoxylon sp. CIN/A4A</i>      | OTB01217                                   | OTB08324                                    |
|             | <i>Daldinia sp. EC12</i>          | OTB19318                                   | OTB09773                                    |
|             | <i>Rosellinia necatrix</i>        | GAP85315                                   | GAP86462                                    |
|             | <i>Sporothrix brasiliensis</i>    | KIH93164                                   | KIH94783                                    |
|             | <i>Sporothrix schenckii</i>       | ERT01693                                   | ERS96419                                    |
|             | <i>Sporothrix insectorum</i>      | OAA62883                                   | OAA55060                                    |
|             | <i>Grosmannia clavigera</i>       | EFX04542                                   | EFX05855                                    |
|             | <i>Ophiostoma piceae</i>          | EPE09790                                   | EPE08842                                    |
|             | <i>Ceratocystis platani</i>       | KKF93314                                   | KKF95651                                    |
|             | <i>Thielaviopsis punctulata</i>   | KKA28569                                   | KKA31156                                    |
|             | <i>Scedosporium apiospermum</i>   | KEZ45887                                   | KEZ46899                                    |
|             | <i>Lomentospora prolificans</i>   | PKS08358                                   | PKS06850                                    |
|             | <i>Verticillium longisporum</i>   | CRK42202                                   | CRK29542                                    |
|             | <i>Verticillium dahliae</i>       | EGY15355                                   | EGY15047                                    |

| Taxa             | Species                                         | Accession numbers of <i>CME5</i> orthologs | Accession numbers of <i>CME11</i> orthologs |
|------------------|-------------------------------------------------|--------------------------------------------|---------------------------------------------|
|                  | <i>Verticillium dahliae</i> JR2                 | VDAG_JR2_Chr7g0<br>0740aN/A00001           | VDAG_JR2_Chr7g09<br>390aN/A00001            |
|                  | <i>Colletotrichum gloeosporioides</i>           | ELA28510                                   | ELA35903                                    |
|                  | <i>Colletotrichum higginsianum</i>              | CCF35156                                   | CCF34175                                    |
|                  | <i>Colletotrichum graminicola</i>               | EFQ33653                                   | EFQ27168                                    |
|                  | <i>Colletotrichum orbiculare</i>                | ENH84638                                   | ENH85212                                    |
| Xylonomycetes    | <i>Xylona heveae</i>                            | KZF24446                                   | KZF25113                                    |
| Orbiliomycetes   | <i>Dactylellina haptotyla</i>                   | EPS41826                                   | EPS40028                                    |
|                  | <i>Drechlerella stenobrocha</i>                 | EWC43581                                   | EWC47874                                    |
|                  | <i>Arthrobotrys oligospora</i>                  | EGX48516                                   | EGX47014                                    |
| Pezizomycetes    | <i>Tuber borchii</i>                            | PUU77132                                   | PUU72448                                    |
|                  | <i>Tuber magnatum</i>                           | PWW79156                                   | PWW77110                                    |
|                  | <i>Tuber melanosporum</i>                       | CAZ83502                                   | CAZ85197                                    |
| Saccharomycotina | <i>Kuraishia capsulata</i>                      | CDK25732                                   | CDK27282                                    |
|                  | <i>Babjeviella inositovora</i>                  | ODQ79190                                   | ODQ81103                                    |
|                  | <i>Nadsonia fulvescens</i> var. <i>elongata</i> | ODQ67364                                   | ODQ66692                                    |
|                  | <i>Pachysolen tannophilus</i>                   | ODV95945                                   | ODV98409                                    |
|                  | <i>Ascoidea rubescens</i>                       | ODV58138                                   | ODV63540                                    |
|                  | <i>Tortispora caseinolytica</i>                 | ODV91692                                   | ODV92968                                    |
|                  | <i>Lipomyces starkeyi</i>                       | N/A                                        | ODQ71643                                    |
|                  | <i>Hanseniaspora guilliermondii</i>             | N/A                                        | SGZ38559                                    |
|                  | <i>Sugiyamaella lignohabitans</i>               | N/A                                        | ANB14848                                    |
|                  | <i>Sugiyamaella lignohabitans</i>               | ANB14514                                   | ANB14847                                    |
|                  | <i>Wickerhamiella sorbophila</i>                | PRT56865                                   | PRT56045                                    |
|                  | <i>Metschnikowia bicuspidata</i>                | OBA22139                                   | OBA19361                                    |
|                  | <i>Clavispora lusitaniae</i>                    | EEQ36821                                   | EEQ37671                                    |
|                  | <i>[Candida] pseudohaemulonii</i>               | PSK35186.1                                 | PSK38353.1                                  |
|                  | <i>Suhomyces tanzawaensis</i>                   | ODV79240                                   | ODV78713                                    |
|                  | <i>Hyphopichia burtonii</i>                     | ODV67022                                   | ODV67235                                    |
|                  | <i>Spathaspora passalidarum</i>                 | EGW31686                                   | EGW31090                                    |
|                  | <i>Millerozyma farinosa</i>                     | CCE79344                                   | CCE72504                                    |
|                  | <i>Millerozyma farinosa</i>                     | CCE88629                                   | CCE73070                                    |
|                  | <i>Lodderomyces elongisporus</i>                | EDK44610                                   | EDK45846                                    |
|                  | <i>Scheffersomyces stipitis</i>                 | ABN64574                                   | ABN64379                                    |
|                  | <i>Meyerozyma guilliermondii</i>                | EDK37907                                   | EDK38950                                    |
|                  | <i>Debaryomyces hansenii</i>                    | CAR65398                                   | CAG90927                                    |
|                  | <i>Candida tropicalis</i>                       | CTRG_02455N/At43<br>1N/Ap1                 | CTRG_06068N/At43<br>1N/Ap1                  |
|                  | <i>Candida parapsilosis</i>                     | CPAR2_807050N/AT<br>N/Ap1                  | CPAR2_502540N/AT<br>N/Ap1                   |
|                  | <i>Candida albicans</i>                         | C3_05720C_AN/ATN<br>/Ap1                   | C5_04640C_AN/ATN<br>/Ap1                    |

| Taxa                         | Species                                    | Accession numbers of <i>CME5</i> orthologs | Accession numbers of <i>CME11</i> orthologs |
|------------------------------|--------------------------------------------|--------------------------------------------|---------------------------------------------|
|                              | <i>Yarrowia lipolytica</i>                 | CAG79248                                   | CAG78597                                    |
|                              | <i>Lachancea lanzarotensis</i>             | CEP62943                                   | CEP64038                                    |
|                              | <i>Lachancea dasiensis</i>                 | SCU95388                                   | SCU79573                                    |
| Saccharomycotina             | <i>Kazachstania naganishii</i>             | CCK68501                                   | CCK72396                                    |
|                              | <i>Kazachstania africana</i>               | CCF59016                                   | CCF57837                                    |
|                              | <i>Tetrapisispora phaffii</i>              | CCE62983                                   | CCE65572                                    |
|                              | <i>Tetrapisispora blattae</i>              | CCH60292                                   | CCH60477                                    |
|                              | <i>Naumovozya dairenensis</i>              | CCD26864                                   | CCD23112                                    |
|                              | <i>Naumovozya castellii</i>                | CCC70125                                   | CCC70475                                    |
|                              | <i>Vanderwaltozyma polyspora DSM 70294</i> | EDO15218                                   | EDO16503                                    |
|                              | <i>Eremothecium cymbalariae</i>            | AET37448                                   | AET39781                                    |
|                              | <i>Ashbya gossypii</i>                     | AAS53120                                   | AAS50910                                    |
|                              | <i>Eremothecium gossypii</i>               | AEY97429                                   | AEY95199                                    |
|                              | <i>Candida glabrata</i>                    | CAGL0I07029gN/ATN/Ap1                      | CAGL0G00528gN/ATN/Ap1                       |
|                              | <i>Zygosaccharomyces parabailii</i>        | AQZ16838                                   | AQZ13508                                    |
|                              | <i>Zygosaccharomyces parabailii</i>        | AQZ12610                                   | AQZ12205                                    |
|                              | <i>Zygosaccharomyces rouxii</i>            | CAR31048                                   | CAR27823                                    |
|                              | <i>Torulaspota delbrueckii</i>             | CCE92180                                   | CCE93426                                    |
|                              | <i>Saccharomyces cerevisiae</i>            | YGL216W                                    | YGR270W                                     |
|                              | <i>Brettanomyces bruxellensis</i>          | EIF45371                                   | EIF49550                                    |
|                              | <i>Ogataea parapolyomorpha</i>             | ESW99649                                   | ESX01384                                    |
|                              | <i>Ogataea polymorpha</i>                  | OBA15609                                   | OBA15237                                    |
|                              | <i>Pichia membranifaciens</i>              | ODQ49292                                   | ODQ45860                                    |
|                              | <i>Pichia kudriavzevii</i>                 | KGK37239                                   | KGK37068                                    |
|                              | <i>Wickerhamomyces ciferrii</i>            | CCH44210                                   | CCH41644                                    |
|                              | <i>Wickerhamomyces anomalus</i>            | ODQ60370                                   | ODQ58714                                    |
|                              | <i>Komagataella phaffii</i>                | AOA66149                                   | AOA67068                                    |
|                              | <i>Komagataella pastoris</i>               | CAY68351                                   | CAY69022                                    |
|                              | <i>Cyberlindnera fabianii</i>              | CDR38708                                   | CDR39644                                    |
| <i>Cyberlindnera jadinii</i> | CEP23379                                   | CEP21122                                   |                                             |
| Taphrinomycotina             | <i>Protomyces lactucaedebilis</i>          | N/A                                        | ORY80917                                    |
|                              | <i>Pneumocystis carinii B80</i>            | KTW26769                                   | KTW28488                                    |
|                              | <i>Pneumocystis jirovecii RU7</i>          | KTW31950                                   | KTW27844                                    |
|                              | <i>Neolecta irregularis</i>                | OLL25260                                   | OLL26793                                    |
|                              | <i>Pneumocystis murina B123</i>            | EMR09100                                   | EMR08926                                    |
|                              | <i>Schizosaccharomyces cryophilus</i>      | EPY50503                                   | EPY49237                                    |
|                              | <i>Schizosaccharomyces cryophilus</i>      | EPY52965                                   | EPY53323                                    |
|                              | <i>Schizosaccharomyces octosporus</i>      | N/A                                        | EPX71462                                    |
|                              | <i>Schizosaccharomyces octosporus</i>      | EPX73981                                   | EPX72301                                    |
|                              | <i>Schizosaccharomyces japonicus</i>       | EEB06254                                   | EEB09484                                    |
|                              | <i>Schizosaccharomyces japonicus</i>       | EEB07251                                   | EEB07798                                    |



| Taxa                                    | Species                                   | Accession numbers of <i>CME5</i> orthologs | Accession numbers of <i>CME11</i> orthologs |
|-----------------------------------------|-------------------------------------------|--------------------------------------------|---------------------------------------------|
|                                         | <i>Schizosaccharomyces pombe</i>          | SPBC2F12.13.1                              | SPBP22H7.05c.1                              |
|                                         | <i>Schizosaccharomyces pombe</i>          | SPBC1685.15c.1                             | SPAC31G5.19.1                               |
| Agaricomycotina                         | <i>Sistotremastrum niveocreum</i> HHB9708 | KZS97741                                   | KZS90890                                    |
|                                         | <i>Sistotremastrum suecicum</i>           | KZT41104                                   | KZT35228                                    |
|                                         | <i>Fibroporia radiculosa</i>              | CCM01719                                   | CCM04953                                    |
|                                         | <i>Gelatoporia subvermispora B</i>        | EMD40693                                   | EMD41130                                    |
|                                         | <i>Phanerochaete chrysosporium</i>        | AGR57_2577T0N/Ap1                          | AGR57_2778T0N/Ap1                           |
|                                         | <i>Phlebiopsis gigantea</i>               | KIP01742                                   | KIP07567                                    |
|                                         | <i>Daedalea quercina</i>                  | KZT74426                                   | KZT74624                                    |
|                                         | <i>Fomitopsis pinicola</i>                | EPS95344                                   | EPS99772                                    |
|                                         | <i>Laetiporus sulphureus</i>              | KZT12755                                   | KZT13243                                    |
|                                         | <i>Wolfiporia cocos</i>                   | PCH41232                                   | PCH41735                                    |
|                                         | <i>Postia placenta</i>                    | EED80779                                   | N/A                                         |
|                                         | <i>Phlebia centrifuga</i> str. FBCC195    | PSR73094                                   | N/A                                         |
|                                         | <i>Phlebia centrifuga</i> str. FBCC195    | PSR73093                                   | PSR70646                                    |
|                                         | <i>Ganoderma sinense</i> ZZ0214N/A1       | N/A                                        | PIL36444                                    |
|                                         | <i>Dichomitus squalens</i>                | EJF61268                                   | EJF60052                                    |
|                                         | <i>Trametes coccinea</i>                  | OSD04294                                   | OSD01938                                    |
|                                         | <i>Trametes cinnabarina</i>               | CDO76269                                   | CDO76348                                    |
|                                         | <i>Grifola frondosa</i>                   | N/A                                        | OBZ65488                                    |
|                                         | <i>Grifola frondosa</i>                   | N/A                                        | OBZ65485                                    |
|                                         | <i>Grifola frondosa</i>                   | N/A                                        | OBZ65479                                    |
|                                         | <i>Grifola frondosa</i>                   | N/A                                        | OBZ65477                                    |
|                                         | <i>Grifola frondosa</i>                   | OBZ76647                                   | OBZ66657                                    |
|                                         | <i>Exidia glandulosa</i>                  | KZW04054                                   | KZV87322                                    |
|                                         | <i>Sphaerobolus stellatus</i>             | N/A                                        | KIJ25230                                    |
|                                         | <i>Plicaturopsis crispa</i>               | N/A                                        | KII83379                                    |
|                                         | <i>Serendipita indica</i>                 | CCA71673                                   | CCA68645                                    |
|                                         | <i>Serendipita vermifera</i>              | KIM29533                                   | KIM30521                                    |
|                                         | <i>Jaapia argillacea</i>                  | KDQ64669                                   | KDQ53031                                    |
|                                         | <i>Tulasnella calospora</i>               | KIO31083                                   | KIO27756                                    |
|                                         | <i>Rhizoctonia solani</i>                 |                                            | ELU39804                                    |
|                                         | <i>Rhizoctonia solani</i>                 | ELU45940                                   | ELU39803                                    |
|                                         | <i>Botryobasidium botryosum</i>           | KDQ20755                                   | KDQ07766                                    |
|                                         | <i>Punctularia strigosozonata</i>         | N/A                                        | EIN04309                                    |
|                                         | <i>Peniophora</i> sp. CONT                | KZV65810                                   | KZV64901                                    |
| <i>Heterobasidion irregulare</i>        | ETW83834                                  | ETW84776                                   |                                             |
| <i>Neolentinus lepideus</i>             | KZT20739                                  | KZT23205                                   |                                             |
| <i>Gloeophyllum trabeum</i>             | EPQ59379                                  | EPQ59821                                   |                                             |
| <i>Piloderma croceum</i>                | KIM83755                                  | KIM77984                                   |                                             |
| <i>Fibularhizoctonia</i> sp. CBS 109695 | KZP12090                                  | KZP14111                                   |                                             |

| <b>Taxa</b> | <b>Species</b>                         | <b>Accession numbers of CME5 orthologs</b> | <b>Accession numbers of CME11 orthologs</b> |
|-------------|----------------------------------------|--------------------------------------------|---------------------------------------------|
|             | <i>Scleroderma citrinum</i> Foug A     | KIM67893                                   | KIM62979                                    |
|             | <i>Serpula lacrymans</i>               | EGO01696                                   | EGO01438                                    |
|             | <i>Suillus luteus</i>                  | KIK44479                                   | KIK35382                                    |
|             | <i>Pisolithus tinctorius</i>           | KIO13047                                   | KIO06726                                    |
|             | <i>Pisolithus microcarpus</i>          | N/A                                        | KIK10832                                    |
|             | <i>Pisolithus microcarpus</i>          | KIK30766                                   | KIK22454                                    |
|             | <i>Coniophora puteana</i>              | EIW76156                                   | EIW81740                                    |
|             | <i>Hydnomerulius pinastri</i>          | N/A                                        | KIJ58849                                    |
|             | <i>Paxillus involutus</i>              | N/A                                        | KIJ12906                                    |
|             | <i>Rhizopogon vesiculosus</i>          | OJA15288                                   | OJA13163                                    |
|             | <i>Schizopora paradoxa</i>             | KLO15887                                   | KLO08586                                    |
|             | <i>Moniliophthora roreri</i>           | ESK97519                                   | ESK87512                                    |
|             | <i>Pleurotus ostreatus</i>             | KDQ29068                                   | KDQ28800                                    |
|             | <i>Fistulina hepatica</i>              | KIY45890                                   | N/A                                         |
|             | <i>Laccaria amethystina</i>            | KIK08532                                   | KIJ96470                                    |
|             | <i>Amanita muscaria</i>                | KIL68284                                   | KIL57962                                    |
|             | <i>Amanita thiersii</i>                | PFH52655                                   | PFH47155                                    |
|             | <i>Hebeloma cylindrosporum</i> h7      | KIM45886                                   | KIM42662                                    |
|             | <i>Hypholoma sublateritium</i>         | N/A                                        | KJA26723                                    |
|             | <i>Hypholoma sublateritium</i>         | KJA24547                                   | KJA16093                                    |
|             | <i>Galerina marginata</i>              | KDR83404                                   | KDR74229                                    |
|             | <i>Agaricus bisporus</i>               | EKM80463                                   | EKM75062                                    |
|             | <i>Schizophyllum commune</i>           | EFJ01966                                   | EFI91263                                    |
|             | <i>Coprinopsis cinerea</i>             | EAU84516                                   | EAU82409                                    |
|             | <i>Cylindrobasidium torrendii</i>      | KIY73808                                   | KIY64424                                    |
|             | <i>Armillaria solidipes</i>            | PBK69860                                   | PBK77710                                    |
|             | <i>Armillaria ostoyae</i>              | SJL02236                                   | SJL04491                                    |
|             | <i>Armillaria gallica</i>              | PBL02793                                   | PBK96418                                    |
|             | <i>Termitomyces</i> sp. J132           | KNZ80049                                   | KNZ76869                                    |
|             | <i>Hypsizygus marmoreus</i>            | RDB23217                                   | RDB20374                                    |
|             | <i>Lentinula edodes</i>                | GAV99415                                   | GAW05459                                    |
|             | <i>Dacryopinax primogenitus</i>        | EJU06219                                   | EJU05964                                    |
|             | <i>Calocera cornea</i>                 | KZT62930                                   | KZT51813                                    |
|             | <i>Calocera viscosa</i>                | KZO97986                                   | KZO93796                                    |
|             | <i>Cutaneotrichosporon oleaginosum</i> | KLT42998                                   | KLT43208                                    |
|             | <i>Kwoniella bestiolae</i>             | OCF25245                                   | OCF27254                                    |
|             | <i>Cryptococcus neoformans</i>         | AAW41432                                   | AAW43293                                    |
|             | <i>Naematelia encephala</i>            | ORY34049                                   | ORY30784                                    |
|             | <i>Kockovaella imperatae</i>           | ORX36676                                   | ORX34940                                    |
|             | <i>Wallemia ichthyophaga</i>           | EOR00793                                   | EOR00923                                    |
|             | <i>Mixia osmundae</i>                  | GAA97376                                   | GAA96394                                    |



| <b>Taxa</b>        | <b>Species</b>                         | <b>Accession numbers of CME5 orthologs</b> | <b>Accession numbers of CME11 orthologs</b> |
|--------------------|----------------------------------------|--------------------------------------------|---------------------------------------------|
| Pucciniomycotina   | <i>Melampsora lariciN/Apopulina</i>    | EKG08420                                   | EKG12523                                    |
|                    | <i>Puccinia triticina</i>              | N/A                                        | PTTG_08916P0                                |
|                    | <i>Puccinia triticina</i>              | PTTG_08274P0                               | PTTG_07466P0                                |
|                    | <i>Puccinia coronata</i>               | PLW25709                                   | PLW20127                                    |
|                    | <i>Puccinia coronata</i>               | PLW43017                                   | PLW54704                                    |
|                    | <i>Puccinia striiformis</i>            | JGI_V11_PST130_P500825                     | JGI_V11_PST130_P489871                      |
|                    | <i>Puccinia sorghi</i>                 | KNZ54119                                   | KNZ62701                                    |
|                    | <i>Puccinia graminis</i>               | EHS63723                                   | EFP93546                                    |
|                    | <i>Puccinia graminis</i>               | GMQ_11388T0                                | GMQ_04304T0                                 |
|                    | <i>Rhodotorula toruloides</i>          | EGU13331                                   | EGU13313                                    |
|                    | <i>Rhodotorula graminis</i>            | KPV78526                                   | KPV78316                                    |
|                    | <i>Leucosporidium creatinivorum</i>    | ORY75020                                   | N/A                                         |
|                    | <i>Microbotryum violaceum</i>          | MVLG_00229T0                               | MVLG_00163T0                                |
| Ustilaginomycotina | <i>Pseudomicrostroma glucosiphilum</i> | PWN23680                                   | PWN18178                                    |
|                    | <i>Jaminaea rosea</i>                  | PWN30415                                   | PWN25435                                    |
|                    | <i>Tilletiopsis washingtonensis</i>    | PWN95366                                   | PWN99161                                    |
|                    | <i>Ceraceosorus guamensis</i>          | PWN42631                                   | PWN42020                                    |
|                    | <i>Tilletiaria anomala</i>             | KDN46460                                   | KDN52879                                    |
|                    | <i>Meira miltonrushii</i>              | PWN33890                                   | PWN36146                                    |
|                    | <i>Acaromyces ingoldii</i>             | PWN94269                                   | PWN92347                                    |
|                    | <i>Testicularia cyperi</i>             | PWZ00726                                   | PWY98015                                    |
|                    | <i>Kalmanozyma brasiliensis</i>        | EST07537                                   | EST08892                                    |
|                    | <i>Pseudozyma hubeiensis</i>           | GAC96412                                   | GAC93214                                    |
|                    | <i>Anthracoystis flocculosa</i>        | EPQ26480                                   | EPQ27843                                    |
|                    | <i>Moesziomyces aphidis</i>            | N/A                                        | ETS60280                                    |
|                    | <i>Sporisorium reilianum</i>           | CBQ71776                                   | CBQ69089                                    |
|                    | <i>Ustilago hordei</i>                 | CCF53483                                   | CCF48325                                    |
|                    | <i>Ustilago maydis</i>                 | KIS70390                                   | KIS67562                                    |

N/A, not available.
