# Supplementary material for: Experimental evidence for the functional importance and adaptive advantage of A-to-I RNA editing in fungi
Source: PubMed Central journal article supplement — Proc Natl Acad Sci U S A. 2023 Mar 14;120(12):e2219029120. doi: 10.1073/pnas.2219029120 (PMC10041177; doi:10.1073/pnas.2219029120), 2023-03-14
Supplement: pnas.2219029120.sd02.pdf [file pnas.2219029120.sd02.pdf]

**Dataset S2.** Primers used in this study.

| Category      | Primer name                                        | Primer sequence (5'-3')*                             |
|---------------|----------------------------------------------------|------------------------------------------------------|
| Gene deletion | CME1-1F                                            | GCAGGTCACACGATGGGTTTC                                |
|               | CME1-2R                                            | TTGACCTCCACTAGCTCCAGCCAAGCCGCGTTGTGTTGTGTGCGTGA      |
|               | CME1-3F                                            | GAATAGAGTAGATGCCGACCGCGGGTTGCAATTGTTGATGATATGGAGCG   |
|               | CME1-4R                                            | CCCTTCGACTTTTGCCACATC                                |
|               | CME1-5F                                            | CTCAATCCCCGAAAGACGTC                                 |
|               | CME1-6R                                            | GGCCCTCAAGGACATCATAACAG                              |
|               | CME1-7F                                            | CAGTAACAGAACCGGCGATC                                 |
|               | CME1-8R                                            | TACATCCCTCTTGCCTCACC                                 |
|               | CME1-TK2R                                          | TTGACCTCCACTAGCTCCAGCCAAGCCTAATTAAGCGAGGATGGATGCG    |
|               | CME1-TK3F                                          | CGTCCGCAATGTGTTATTAAGTCGACCAACCATGGAAAAAGGCGTT       |
|               | CME3-1F                                            | AGCTTCTGACCGCAATGCC                                  |
|               | CME3-2R                                            | TTGACCTCCACTAGCTCCAGCCAAGCCCTTCAAGTGGCCGACAACG       |
|               | CME3-3F                                            | GAATAGAGTAGATGCCGACCGCGGGTTGCCTTTCTGCGTCATGATCAAG    |
|               | CME3-4R                                            | CTAAGCCATGGAAGTGTAACTGTAC                            |
|               | CME3-5F                                            | CCTACCCGACGCGATCGTTAT                                |
|               | CME3-6R                                            | TTCTGCTTGAGCCTGTAATGC                                |
|               | CME3-7F                                            | ATCAGCCATATCGTCAGCGTG                                |
|               | CME3-8R                                            | GACATGGGCAAGCAAGGTCC                                 |
|               | CME5-1F                                            | TTTTTCATCATAGCGTGGGTCATTGG                           |
|               | CME5-2R                                            | TTGACCTCCACTAGCTCCAGCCAAGCCGACAGTTAGCGACTGGAGTGTTC   |
|               | CME5-3F                                            | GAATAGAGTAGATGCCGACCGCGGGTTATGGCGATGAGGTGACCTGTATAAT |
|               | CME5-4R                                            | GACTTCGTTTGGTTTGCATGGTT                              |
|               | CME5-5F                                            | GCTGTGGAAAGACGCATACCATTAC                            |
|               | CME5-6R                                            | TAGCAGAGTGCTCATAGGCTGTTCCG                           |
|               | CME5-7F                                            | ACACATTCTCAATAGTGCTCTATCC                            |
|               | CME5-8R                                            | CGTCTCGTCTTCTATCCAATCATCA                            |
|               | CME5-TK2R                                          | TTGACCTCCACTAGCTCCAGCCAAGCCTCGGTGTTTACTCGTTATGCGGT   |
|               | CME5-TK3F                                          | CGTCCGCAATGTGTTATTAAGTCGACGGTGACCTGTATAATAACGCTCGTG  |
|               | CME6-1F                                            | GATGCGCAACATAGTCTGACAG                               |
|               | CME6-2R                                            | TTGACCTCCACTAGCTCCAGCCAAGCCCAATGGTGTGACAGTGAGAGAGATG |
| CME6-3F       | GAATAGAGTAGATGCCGACCGCGGGTTCGTAGCAGTAAACAGGGATGGAA |                                                      |
| CME6-4R       | GTGTTGAGGGTCCAAGAACTC                              |                                                      |
| CME6-5F       | CGATGGCCTTGAGGAACGTTAT                             |                                                      |
| CME6-6R       | CAGCTCGCGTCGTCATCATC                               |                                                      |

| Category | Primer name | Primer sequence (5'-3')*                                 |
|----------|-------------|----------------------------------------------------------|
|          | CME6-7F     | CAGCGTAGTAAC TTTGTGAATCAG                                |
|          | CME6-8R     | GTACTCCTGAGTCAGTGACAGATG                                 |
|          | CME6-TK2R   | TTGACCTCCACTAGCTCCAGCCAAGCCCAATGGTGTGAC<br>AGTGAGAGAGATG |
|          | CME6-TK3F   | CGTCCGCAATGTGTTATTAAGTCGACCGTAGCAGTAACA<br>GGGATGGAA     |
|          | CME7-1F     | CGTAAGGAGAGTAGCCATCCCAAGT                                |
|          | CME7-2R     | TTGACCTCCACTAGCTCCAGCCAAGCCAGACTGATTCTC<br>GGTCCCTTTGTTG |
|          | CME7-3F     | GAATAGAGTAGATGCCGACCGCGGGTTTGCTCGTCGAA<br>TGGTCTCAGGT    |
|          | CME7-4R     | ACGGAGACTCTGAGGATGAGGAATG                                |
|          | CME7-5F     | CTTTGAAGCCCGCTATCAGATTGTT                                |
|          | CME7-6R     | GCCAACAAAAGTTTCGCCTTCTAC                                 |
|          | CME7-7F     | CTCTCTCCTCCGCTGATAACAT                                   |
|          | CME7-8R     | ATTCTGGATGGTAAGGACTACCTCG                                |
|          | CME7-TK2R   | TTGACCTCCACTAGCTCCAGCCAAGCCAGACTGATTCTC<br>GGTCCCTTTGTTG |
|          | CME7-TK3F   | CGTCCGCAATGTGTTATTAAGTCGACTGCTCGTCGAATG<br>GTCTCAGGT     |
|          | CME8-1F     | CTTCTGTAGCCAGGATCCCAAG                                   |
|          | CME8-2R     | TTGACCTCCACTAGCTCCAGCCAAGCCCGAGGCGAAAA<br>TTGCGAGTTAG    |
|          | CME8-3F     | GAATAGAGTAGATGCCGACCGCGGGTTGGAAGAGTCGA<br>AACAGCATGAT    |
|          | CME8-4R     | ATCTTCATCGTTCCATGGCGC                                    |
|          | CME8-5F     | CATACGACAGTTGCCACATT                                     |
|          | CME8-6R     | TTCTTGACTTCAGGTTCCCAAT                                   |
|          | CME8-7F     | AGTGTGCAAGTCGGAGCG                                       |
|          | CME8-8R     | CTTACCCGCCTCAGTCCAAC                                     |
|          | CME9-1F     | GCCCTGCCATTTCTCTGGTC                                     |
|          | CME9-2R     | TTGACCTCCACTAGCTCCAGCCAAGCCGTTCTGTTGGCC<br>CAGGTAGTTG    |
|          | CME9-3F     | GAATAGAGTAGATGCCGACCGCGGGTTGAAGCATGAGG<br>CATCAGA ACTG   |
|          | CME9-4R     | GTCTCATT CATCTGACCTCCTCG                                 |
|          | CME9-5F     | CTCCTATTGCTGCCGATT CG                                    |
|          | CME9-6R     | GAACCGCAAAGGCATCGTGT                                     |
|          | CME9-7F     | GAGGGCCTCAGATATATGACACG                                  |
|          | CME9-8R     | GTCCCCTATATGGTTTCAAGCACG                                 |
|          | CME10-1F    | GATTCTGGGGCCTTGAGCTTC                                    |
|          | CME10-2R    | TTGACCTCCACTAGCTCCAGCCAAGCCGGTGTCTTTCTG<br>GAGTGGT CG    |
|          | CME10-3F    | GAATAGAGTAGATGCCGACCGCGGGTTGGTTCTCATGT<br>GGATGCTCTTG    |
|          | CME10-4R    | GGTTTCACTGCTCTGCCAG                                      |
|          | CME10-5F    | CCATGCCGAAGAGATTGATGAG                                   |

| Category | Primer name | Primer sequence (5'-3')*                                 |
|----------|-------------|----------------------------------------------------------|
|          | CME10-6R    | CACCCATTTTCGTTGGTTGCC                                    |
|          | CME10-7F    | ATACGCCATGGCCTCTATCAG                                    |
|          | CME10-8R    | GGATATCTCGACACTCCCTTTGG                                  |
|          | CME10-TK2R  | TTGACCTCCACTAGCTCCAGCCAAGCCGGTGTCTTTCTG<br>GAGTGGTCG     |
|          | CME10-TK3F  | TTGACCTCCACTAGCTCCAGCCAAGCCGGTTCTCATGTG<br>GATGCTCTTG    |
|          | CME11-1F    | CTGAGACGATGGGTGGATGG                                     |
|          | CME11-2R    | TTGACCTCCACTAGCTCCAGCCAAGCCGAGATGGGCGA<br>CGGATGTAA      |
|          | CME11-3F    | GAATAGAGTAGATGCCGACCGCGGGTTGGGCGAACATC<br>ATTGGGCTTCA    |
|          | CME11-4R    | AGAACCCAGGAGAAGCCAAC                                     |
|          | CME11-5F    | AAGAGGATGACGATGACGACGAT                                  |
|          | CME11-6R    | AAGACCACCAACCTTGCTGAAGT                                  |
|          | CME11-7F    | ATGACAGACAGTGAATGAACGGA                                  |
|          | CME11-8R    | GCTATTGAATCTGCAGCTACAG                                   |
|          | CME11-TK2R  | TTGACCTCCACTAGCTCCAGCCAAGCCGAGATGGGCGA<br>CGGATGTAA      |
|          | CME11-TK3F  | CGTCCGCAATGTGTTATTAAGTCGACGGGCGAACATCAT<br>TGGGCTTCA     |
|          | CME12-1F    | CGTGATTGTCTGGAGGTTGTACAC                                 |
|          | CME12-2R    | TTGACCTCCACTAGCTCCAGCCAAGCCGAAAGAGAGTC<br>GCAATCAGGAGA   |
|          | CME12-3F    | GAATAGAGTAGATGCCGACCGCGGGTTGGCTCGTTGCT<br>TTCATTCCTAG    |
|          | CME12-4R    | AGACGTGTCCCCGTTCCCTTC                                    |
|          | CME12-5F    | GCCGAGGAGATGAAGGTTGTG                                    |
|          | CME12-6R    | GCGTTTATCTATGGCGGTGAG                                    |
|          | CME12-7F    | TGTCCTTTTTGGTGCGTGC                                      |
|          | CME12-8R    | GTGCTGAATTGAAACGACAAATGC                                 |
|          | CME14-1F    | ACACCGAACAATTGCTTTTTATGGG                                |
|          | CME14-2R    | TTGACCTCCACTAGCTCCAGCCAAGCCTACTTTTTGTCA<br>TAGGGCTTCGTGC |
|          | CME14-3F    | GAATAGAGTAGATGCCGACCGCGGGTTATCTAAGATGG<br>CCTTGTTTCTTCCC |
|          | CME14-4R    | CAGGTTTCGCAATGATTCTGATGACG                               |
|          | CME14-5F    | TTGTTAACGGCAATGTCATATCAGC                                |
|          | CME14-6R    | ACACATCAAGGGCAAGACCACC                                   |
|          | CME14-7F    | TCTCTATATTCCTTGCCCTGGT                                   |
|          | CME14-8R    | GAGCGTCGATGATATTGAAAAGGTC                                |
|          | CME15-1F    | CCGAGTTGGTCTTGTTCTTCC                                    |
|          | CME15-2R    | TTGACCTCCACTAGCTCCAGCCAAGCCGGAACAAAGCC<br>ACAAACAGGG     |
|          | CME15-3F    | GAATAGAGTAGATGCCGACCGCGGGTTGGAGACCACTT<br>GAACACGTCG     |
|          | CME15-4R    | GCCGATATGATGCCGTGTTG                                     |
|          | CME15-5F    | GAACCATCGCCTCGATCGC                                      |

| Category                         | Primer name | Primer sequence (5'-3')*                                |
|----------------------------------|-------------|---------------------------------------------------------|
|                                  | CME15-6R    | CTGCTGATGCTGGAAGGCTC                                    |
|                                  | CME15-7F    | CAGGAAAAGAAGGCAACAGGAG                                  |
|                                  | CME15-8R    | CATACCCTTTTCGTTTTGCGCC                                  |
|                                  | CME16-1F    | AGGTGCTGGAGGAGTCAGGATTGG                                |
|                                  | CME16-2R    | TTGACCTCCACTAGCTCCAGCCAAGCCGATTGTCTAACC<br>AAACGGTCAGCG |
|                                  | CME16-3F    | GAATAGAGTAGATGCCGACCGCGGGTTTGAGGTTCTC<br>TGGAGAATGTTGTC |
|                                  | CME16-4R    | CTCACCATTTCGCAACGACGCC                                  |
|                                  | CME16-5F    | CCAACGGTGTGTAATAATTGCTAGAG                              |
|                                  | CME16-6R    | ATCCTGGACTTTGCCGCTGTAAT                                 |
|                                  | CME16-7F    | GATGAGCGTTGTTAGGTAGGC                                   |
|                                  | CME16-8R    | TGAGCTTCCTTTCAAGTCTCAGATT                               |
|                                  | CME19-1F    | AGCCACACATTTGTTTGTTC                                    |
|                                  | CME19-2R    | TTGACCTCCACTAGCTCCAGCCAAGCCCGTTGAAAGTAG<br>TAGCGAAGGG   |
|                                  | CME19-3F    | GAATAGAGTAGATGCCGACCGCGGGTTGAGTATATCCC<br>ACTGGCTCGG    |
|                                  | CME19-4R    | CCGAGAACCACCGTAAGTACTC                                  |
|                                  | CME19-5F    | GCCAAAGTTCTCGCTGATAAGG                                  |
|                                  | CME19-6R    | GCCTTGGAGTTTCTTAGCGC                                    |
|                                  | CME19-7F    | GCCAGGATACAGCACAAAGC                                    |
|                                  | CME19-8R    | CAAAGAGCGCTGCTGGAGG                                     |
|                                  | CME21-1F    | GCATACCCTGGTCGGACTTG                                    |
|                                  | CME21-2R    | TTGACCTCCACTAGCTCCAGCCAAGCCGTGACAACGAG<br>ATGAGCTGAGG   |
|                                  | CME21-3F    | GAATAGAGTAGATGCCGACCGCGGGTTGTTTCTGTTAT<br>TCATCTCGTCGTG |
|                                  | CME21-4R    | CTCATACGGCGTTTCACACTTCC                                 |
|                                  | CME21-5F    | CATTCTGCCCATCGACTGTTATC                                 |
|                                  | CME21-6R    | ATCTTCAAGCTTGTGCGAGTTCTTC                               |
|                                  | CME21-7F    | CTCATTCAACTACGCTTCAGTCATC                               |
|                                  | CME21-8R    | CCACGTCCTTCGATATCTCTCG                                  |
| Common primers for gene deletion | HYG-F       | GGCTTGGCTGGAGCTAGTGGAGGTCAA                             |
|                                  | HY-R        | GTATTGACCGATTCTTTCGGTCCGAA                              |
|                                  | YG-F        | GATGTAGGAGGGCGTGGATATGTCCT                              |
|                                  | HT-R        | GGTTCCCGGTCGGCATCTACTCTATTC                             |
|                                  | H856R       | ATCAGCCCCACTTGTAGCAGTAGC                                |
|                                  | H855F       | GTCGATGCGACGCAATCGT                                     |
|                                  | H850        | TTCCTCCCTTTATTTTCAGATTCAA                               |
|                                  | H852        | ATGTTGGCGACCTCGTATTGG                                   |
|                                  | HT-detectF  | GCCGATCTTAGCCAGACGAG                                    |
|                                  | HT-detectR  | GCGGTGCGATGTGTCTGTCTCCTC                                |

| Category              | Primer name  | Primer sequence (5'-3')*                                   |
|-----------------------|--------------|------------------------------------------------------------|
|                       | HT-matchR    | GGATGAGGGCCACGAACGCCAGCAC                                  |
|                       | HT-matchF    | TCGGTCAATACACTACATGGCGTG                                   |
|                       | HT-856R      | GCTACTGCTACAAGTGGGGCTGAT                                   |
|                       | HT-855F      | GCTAACTGAAGTAGATGCCGACCG                                   |
| Under-edited mutation | CME1-e1F     | CGTCCGCAATGTGTTATTAAGTCGACTTGGACCTGCAGC<br>GTGAATG         |
|                       | CME1-ue2R    | GTCGCGGATCATCTCCATCG                                       |
|                       | CME1-ue3F    | CGATGGAGATGATCCGCGACGAGATTATTTCTCTCCAAG<br>AGCACT          |
|                       | CME1-e4R     | GTTCGAAGCCAGAGTTCTGAC                                      |
|                       | CME1-e5F     | AAGGGTCTGATCTCTTTGGC                                       |
|                       | CME1-e6R     | TTGACCTCCACTAGCTCCAGCCAAGCCGTCGCAGTCGT<br>GTTTCTTTG        |
|                       | CME1-e7F     | GTGTCCTGCAACGTGCAAAG                                       |
|                       | CME1-e8R     | ATTCCAATTGCTGCTTCAGG                                       |
|                       | CME1-detectF | TCTTGAAGACCAGGACCAGC                                       |
|                       | CME2-e1F     | GCCGGTAATCATGTGCGCTGG                                      |
|                       | CME2-ue2R    | AATAGCGCGAACCCCTAC                                         |
|                       | CME2-ue3F    | GTAGGGGGTTCGCGCTATTGTCATCTGGTCGCATGTTAC<br>GCA             |
|                       | CME2-e4R     | TTGACCTCCACTAGCTCCAGCCAAGCCCTTTCGTGGCA<br>TGCTGAGTC        |
|                       | CME2-e5F     | GAATAGAGTAGATGCCGACCGGGTTGCCTGTGCGTG<br>CTGTAACCT          |
|                       | CME2-e6R     | GCAGCTGCATTACATATGGATGAG                                   |
|                       | CME2-e7F     | CCTTCCAATGTTATCTCGTCCATTC                                  |
|                       | CME2-e8R     | GGTGAGAGGAGCAAGGATCTTTGG                                   |
|                       | CME2-detectF | CGTCTCTCATGTGCAACAAGCTT                                    |
|                       | CME3-e1F     | GCTTTGTTGACTTTTCGTGGG                                      |
|                       | CME3-ue2R    | GCACGTAGCACATTGTGCCA                                       |
|                       | CME3-ue3F    | TGGCACAATGTGCTACGTGCCATCAACATGGCATCTTGT<br>ATG             |
|                       | CME3-e4R     | TTGACCTCCACTAGCTCCAGCCAAGCCTACCTTGGGCTA<br>CTCTCTCG        |
|                       | CME3-e5F     | ACGTCCGCAATGTGTTATTAAGTCGACCTTCAGTGAGGG<br>TTTCTTTTCG      |
|                       | CME3-e6R     | ATGTTGGTGATGTGGAGGAG                                       |
|                       | CME3-e7F     | AATCTCGCGGGCAATGTCTC                                       |
|                       | CME3-e8R     | GACAACAGGGGTAAGGCTATC                                      |
|                       | CME3-detectF | CGATGGACAGAAACGCGGTA                                       |
|                       | CME5-e1F     | GGCTCCTACAGACTGGCTTCACCG                                   |
|                       | CME5-ue2R    | CATGCGTCTCGCTTGACCTTGAGTC                                  |
|                       | CME5-ue3F    | GACTCAAGGTCAAGCGAGACGCATGAACATGAGCAGTA<br>CTCGC            |
|                       | CME5-e4R     | TTGACCTCCACTAGCTCCAGCCAAGCCGCAAAGGTAAAA<br>GCCAATCCAACCG   |
|                       | CME5-e5F     | ACGTCCGCAATGTGTTATTAAGTCGACCATAACTCTGAC<br>TTTGATGGAGGCTTA |
|                       | CME5-e6R     | GTAACCTGAGCAGGTCACGCCCTA                                   |
|                       | CME5-e7F     | AACCAAACAGCAGGTGCCAACATCT                                  |

| Category | Primer name     | Primer sequence (5'-3')*                                    |
|----------|-----------------|-------------------------------------------------------------|
|          | CME5-e8R        | ATCAATTTGGGGAGAGGCCGAGTTT                                   |
|          | CME5-detectF    | GACTGCTCTCCGCACAGCCATG                                      |
|          | CME6-e1F        | CGTCCGCAATGTGTTATTAAGTCGACCGCTCTGCAACTT<br>TGATTCCG         |
|          | CME6-ue2R       | CGGCCCTCTTCTT <b>C</b> ACGACC                               |
|          | CME6-ue3F       | GGTCGT <b>G</b> AAGAAGAGGGCCGTAGTAGCGATCTCTATGC<br>TTGCC    |
|          | CME6-e4R        | GGATCGTCTTGCCCTTGAG                                         |
|          | CME6-e5F        | CCCACTGAGTGACATTACCAAAC                                     |
|          | CME6-e6R        | TTGACCTCCACTAGCTCCAGCCAAGCCACGGACAAAGC<br>CATCATTAGAC       |
|          | CME6-e7F        | GGCCGTCCAAC TAGAATTCT                                       |
|          | CME6-e8R        | CAATCCTCCGTGCTGAACAG                                        |
|          | CME6-detectF    | TTATAATCGCTCTGCCTCGC                                        |
|          | CME7-e1F        | CCATCACACAGCAACAAGAC                                        |
|          | CME7-ue2R       | CCTCCTCGTTCTT <b>C</b> GCGGCA                               |
|          | CME7-ue3F       | TGCCGC <b>G</b> AAGAACGAGGAGTTGCCCGTATCGCTGCTG<br>AG        |
|          | CME7-e4R        | TTGACCTCCACTAGCTCCAGCCAAGCCACAAGAAGTGAC<br>GTCAAAACAAC      |
|          | CME7-e5F        | CGTCCGCAATGTGTTATTAAGTCGACCAGTCTGAAGGTA<br>TCAAAAGCC        |
|          | CME7-e6R        | CTCTCCCAATTACTTCTCGC                                        |
|          | CME7-e7F        | CACTAAGAACACGCCTATGGAG                                      |
|          | CME7-e8R        | TCCAAATCCCCCGAGAAATC                                        |
|          | CME7-detectF    | CCTAGAGGCGCTGATGGTAC                                        |
|          | CME10-1e1F      | ACCGCGTTACTACTATGTTA                                        |
|          | CME10-1ue2R     | ATTGCTGTACGTT <b>C</b> AGAAGAAT                             |
|          | CME10-1ue3F     | ATTCTTCT <b>G</b> AACGTGACAGCAATCGTTTTCGCAGCAACCT<br>CAAC   |
|          | CME10-1e4R      | TTGACCTCCACTAGCTCCAGCCAAGCCGCAACTCCATT<br>GCTGATTCTG        |
|          | CME10-1e5F      | CGTCCGCAATGTGTTATTAAGTCGACTCGAATGTAGGCA<br>CTGGTGT          |
|          | CME10-1e6R      | CGCACCTCTCATCTTTACTGG                                       |
|          | CME10-e7F       | ACTTAACCCTTCATTGGTGC                                        |
|          | CME10-e8R       | GGAGGGCATTCTGGAATCG                                         |
|          | CME10-1detectF  | CAGTGACTATGAGGATGACGAC                                      |
|          | CME10-2e1F      | ACCGCGTTACTACTATGTTA                                        |
|          | CME10-2ue2R     | CAAAACAAGAGGGACATAGTT <b>C</b> GA                           |
|          | CME10-2ue3F     | TC <b>G</b> AACTATGTCCCTCTTGTTTTG<br>AACTATTTGCCCATCAAGATGT |
|          | CME10-2e4R      | TTGACCTCCACTAGCTCCAGCCAAGCCGCAACTCCATT<br>GCTGATTCTG        |
|          | CME10-2e5F      | TCGAATGTAGGCACTGGTGT                                        |
|          | CME10-2e6R      | CGCACCTCTCATCTTTACTGG                                       |
|          | CME10-2edetectF | GTTTCGCAGCAACCTCAACA                                        |
|          | CME11-1F        | CGTCCGCAATGTGTTATTAAGTCGACAATTGAATGTGCA<br>GCGAGGC          |
|          | CME11-ue2R      | CCTACGCGT <b>G</b> ATAGGCACATC                              |
|          | CME11-ue3F      | GATGTGCCTAT <b>C</b> ACGCGTAGGACTCGTGGAAGTCGCGC<br>CAA      |
|          | CME11-e4R       | GCACCAGCTCCATCGAGGTTT                                       |
|          | CME11-e5F       | GGCCCAAGTGATTCTGTTTATG                                      |

| Category                                           | Primer name    | Primer sequence (5'-3')*                                       |
|----------------------------------------------------|----------------|----------------------------------------------------------------|
|                                                    | CME11-e6R      | TTGACCTCCACTAGCTCCAGCCAAGCCCCTGATCACATT<br>TCCACGTATTC         |
|                                                    | CME11-e7F      | CCATGAACCCGAACTGGTAC                                           |
|                                                    | CME11-e8R      | CTTGATTTTGCCGACGTTGG                                           |
|                                                    | CME11-detectF  | AGCGGAGGAATTCTATGAGC                                           |
|                                                    | CME20-e1F      | CGTCCGCAATGTGTTATTAAGTCGACGTACCAGTATTTT<br>CCACCAGTGT          |
|                                                    | CME20-ue2R     | CTGCCCTCCTGCAGCACCTT                                           |
|                                                    | CME20-ue3F     | AAGGTGCTGCAGGAGGGCAGCTTGAAACGTCAGGTGGC<br>GG                   |
|                                                    | CME20-e4R      | GGTGTGCCTTTCTAATCTTGGTC                                        |
|                                                    | CME20-e5F      | GTACAGATGAAGCGCTCGGA                                           |
|                                                    | CME20-e6R      | TTGACCTCCACTAGCTCCAGCCAAGCCATCATGAGACAT<br>TCTATTTGCCTTC       |
|                                                    | CME20-e7F      | CAATCCAACAACAGCAGCTC                                           |
|                                                    | CME20-e8R      | TCGATGAGTTCTCCGCCAAC                                           |
|                                                    | CME20-detectF  | CCTATTCTAGACGAGGTGGG                                           |
| Over-<br>edited<br>mutation                        | CME1-oe2R      | GTCGCGGATCAATCCATCG                                            |
|                                                    | CME1-oe3F      | CGATGGATGTGATCCGCGACGAGATTATTTCTCTCCAAG<br>AGCACT              |
|                                                    | CME3-oe2R      | GCACGTAGCACATCATGCCA                                           |
|                                                    | CME3-oe3F      | TGGCATGATGTGCTACGTGCCATCAACATGGCATCTTGT<br>ATG                 |
|                                                    | CME5-oe2R      | CATGCGTCCAGCTTGACCTTGAGT                                       |
|                                                    | CME5-oe3F      | ACTCAAGGTCAAGCTGACGCATGAACATGAGCAGTACT<br>CGC                  |
|                                                    | CME6-oe2R      | CGGCCCTCTTCTGACGACC                                            |
|                                                    | CME6-oe3F      | GGTCGTCAAGAAGAGGGCCGTAGTAGCGATCTCTATGC<br>TTGCC                |
|                                                    | CME7-oe2R      | CCTCCTCGTTCTCAGCGGCA                                           |
|                                                    | CME7-oe3F      | TGCCGCTGAGAACGAGGAGTTGCCCGTATCGCTGCTG<br>AG                    |
|                                                    | CME10-1oe2R    | ATTGCTGTCACGTCAAGAAGAAT                                        |
|                                                    | CME10-1oe3F    | ATTCTTCTTGACGTGACAGCAAT<br>CGTTTCGCAGCAACCTCAAC                |
|                                                    | CME10-2oe2R    | CAAAACAAGAGGGACATAGTCAGA                                       |
|                                                    | CME10-2oe3F    | TCTGACTATGTCCCTCTTGTGTTTTG<br>AAACTATTTGCCCATCAAGATGT          |
|                                                    | CME11-oe2R     | CCTACGCGCAATAGGCACATC                                          |
|                                                    | CME11-oe3F     | GATGTGCCTATTGCGCGTAGGACTCGTGGAAGTCGCGC<br>CAA                  |
|                                                    | CME20-oe2R     | CTGCCCTCCGGAGCAC                                               |
|                                                    | CME20-oe3F     | AAGGTGCTCCGGAGGGCAGCTTGAAACGTCAGGTGGC<br>GG                    |
| <i>CME11</i> -<br>GFP<br>ectopic<br>expressio<br>n | CME11-pDL2/F   | CAGATCTTGGCTTTCGTAGGAACCCAATCTTCAATGGTC<br>AGCAAGCGGAAGAGAG    |
|                                                    | CME11-pDL2/R   | CACCACCCCGGTGAACAGCTCCTCGCCCTTGCTCACGT<br>AGTCGCGAGCTTGGCTAGGC |
|                                                    | Insert/F       | CAATAAGTGAGTTACTGCGCACAAAGC                                    |
|                                                    | Insert/R       | CGTGCTGCTTCATGTGGTCCG                                          |
| Ectopic<br>expressio<br>n of over-                 | 02422-L1AD/F   | TCATATGGCCATGGAGGCCAGTGAACCTCGTTAGCATCTC<br>AACCTTACTT         |
|                                                    | 02422-L1G418/R | ACGGCAGAGAAATCGCAACCTCCGGGATCCCGGAACTG<br>GTCGCCTTGTTCATGAT    |

| Category                                           | Primer name    | Primer sequence (5'-3')*                                     |
|----------------------------------------------------|----------------|--------------------------------------------------------------|
| edited allele in <i>CME11<sup>ue</sup></i> mutants | G418-L1/F      | ATCATGAAACAAGGCGACCAGTTCCGGGATCCCGGAGG<br>TTGCGATTTCTCTGCCGT |
|                                                    | G418-L2/R      | CGCATAAAGACGAGACACAAAATCAGCCAGCAGTAGAC<br>ACTTGGAATCTAAAC    |
|                                                    | 02422-L2G418/F | GTTTAGATTCCAAGTGTCTACTGCTGGCTGATTTTGTGTC<br>TCGTCTTTATGCG    |
|                                                    | 02422-L2AD/R   | CATCTGCAGCTCGAGCTCGATGGAAAAGATTGTGTTCCC<br>TGAGTGATGT        |
|                                                    | CME11-3UTR/R   | ACGGCAGAGAAATCGCAACCTCTGCTACTAGACGAAGA<br>CTTCCTGC           |
|                                                    | PCME11-L1/F    | ATCATGAAACAAGGCGACCAGTTATGTGCAGCGAGGCT<br>CGAGAT             |
|                                                    | 02422/5F       | CACTGATTCAAATCCCGTATAAGAA                                    |
|                                                    | 02422/6R       | AATCTCAGCAGGACAAGCCTCGT                                      |
|                                                    | 02422/7F       | GTCGCAGAGCATAACATCTTCAAAG                                    |
|                                                    | 02422/8R       | AAGAATGATAGCATGAGAACCCAGC                                    |
|                                                    | qRT-PCR        | CME5-qPCR/F                                                  |
| CME5-qPCR/R                                        |                | AGATCGGGATGAAGTGGCGTTGG                                      |
| CME11-qPCR/F                                       |                | GCTACCCAACACACCACCTACTT                                      |
| CME11-qPCR/R                                       |                | ACCCTCGGCGTCATCCTCCTT                                        |
| GzUBH/F                                            |                | TCTTAGGGCGATGCAGCAA                                          |
| GzUBH/R                                            |                | CTTGGTCCGGTCGAGAATCC                                         |

\*Mutated nucleotides are marked in red.
